# Supplementary material for: A Systematic Review: Is Aedes albopictus an Efficient Bridge Vector for Zoonotic Arboviruses?
Source: PubMed Central journal article supplement (PMC7238240; doi:10.3390/pathogens9040266), 2020-04-07

Article

## Supplementary information

# A systematic review: Is *Aedes albopictus* an efficient bridge vector for zoonotic arboviruses?

Taissa Pereira dos Santos<sup>1\*</sup>, David Roiz<sup>1</sup>, Ricardo Lourenço-de-Oliveira<sup>2</sup> and Christophe Paupy<sup>1\*</sup><sup>1</sup>MIVEGEC, Univ. Montpellier, IRD, CNRS, Montpellier, 34090, France; david.roiz@ird.fr (D.R.);<sup>2</sup>LATHEMA, Instituto Oswaldo Cruz, FIOCRUZ, Rio de Janeiro-RJ, 4364, Brazil; lourenco@ioc.fiocruz.br (R.L.O.)

\*Correspondence: tayssadnz@gmail.com (T.P.S.); christophe.paupy@ird.fr (C.P.)

Received: date; Accepted: date; Published: date

**Table S1.** List of the 16 articles found by searching Google Scholar to characterize the types of natural breeding sites exploited by *Ae. albopictus*.

---

### References

- Gomes, A.; Forattini, O.; Kakitani, I.; Marques, G.; Marques, C.; Marucci, D.; Brito, M. Microhabitats de *Aedes albopictus* (Skuse) na região do Vale do Paraíba, Estado de São Paulo, Brasil. *Rev. Saúde Pública S. Paulo* **1992**, *26*, 108–118.
- Forattini, O.P.; Marques, G.R.A.M.; Kakitani, I.; De Brito, M.; Sallum, M.A.M. Significado epidemiológico dos criadouros de *Aedes albopictus* em bromélias. *Rev. Saude Publica* **1998**, *32*, 186–188.
- Delatte, H.; Toty, C.; Boyer, S.; Bouetard, A.; Bastien, F.; Fontenille, D. Evidence of Habitat Structuring *Aedes albopictus* Populations in Réunion Island. *PLoS Negl. Trop. Dis.* **2013**, *7*, e2111.
- Marquetti, M.; Bisset, J.; Leyva, M.; Garcia, A.; Rodriguez, M. Comportamiento estacional y temporal de *Aedes aegypti* y *Aedes albopictus* en La Habana, Cuba. **2008**, *60*, 62–67.
- Li, Y.; Kamara, F.; Zhou, G.; Puthiyakunnon, S.; Li, C.; Liu, Y.; Zhou, Y.; Yao, L.; Yan, G.; Chen, X.G. Urbanization Increases *Aedes albopictus* Larval Habitats and Accelerates Mosquito Development and Survivorship. *PLoS Negl. Trop. Dis.* **2014**, *8*, e3301.
- Hiscox, A.; Kaye, A.; Vongphayloth, K.; Banks, I.; Piffer, M.; Khammanithong, P.; Sananikhom, P.; Kaul, S.; Hill, N.; Lindsay, S.W.; et al. Risk factors for the presence of *Aedes aegypti* and *Aedes albopictus* in domestic water-holding containers in areas impacted by the Nam Theun 2 hydroelectric project, Laos. *Am. J. Trop. Med. Hyg.* **2013**, *88*, 1070–1078.
- Marque Marquetti, M.; Bisset, J.; Leyva, M.; Garcia, A.; Rodriguez, M. Comportamiento estacional y temporal de *Aedes aegypti* y *Aedes albopictus* en La Habana, Cuba. **2008**, *60*, 62–67.
- Amerasinghe, F.P.; Alagoda, T.S.B. Mosquito oviposition in bamboo traps, with special reference to *Aedes albopictus*, *Aedes novalbopictus* and *Armigeres subalbatus*. *Insect Sci. Applic.* **1984**, *5*, 493–500.
- Gilotra, S.K.; Rozeboom, L.E.; Bhattacharya, N.C. Observations on possible competitive displacement between populations of *Aedes aegypti* Linnaeus and *Aedes albopictus* Skuse in Calcutta. *Bull. World Health Organ.* **1967**, *37*, 437–446.
- Kamgang, B.; Ngoagouni, C.; Manirakiza, A.; Nakouné, E.; Paupy, C.; Kazanji, M. Temporal Patterns of Abundance of *Aedes aegypti* and *Aedes albopictus* (Diptera: Culicidae) and Mitochondrial DNA Analysis of *Ae. albopictus* in the Central African Republic. *PLoS Negl. Trop. Dis.* **2013**, *7*, e2590.
- Forattini, O.P.; Brito, M. de B. Brief Communication an Unusual Ground Larval Habitat of *Aedes albopictus*. *Rev. Inst. Med. Trop. Sao Paulo* **1998**, *40*, 121–122.
- Simard, F.; Nchoutpouen, E.; Toto, J.C.; Fontenille, D. Geographic distribution and breeding site preference of *Aedes albopictus* and *Aedes aegypti* (Diptera: culicidae) in Cameroon, Central Africa. *J Med Entomol* **2005**, *42*, 726–731.
- Sota, T.; Mogi, M.; Hayamizu, E. Seasonal distribution and habitat selection by *Aedes albopictus* and *Aedes riversi* (Diptera: Culicidae) in Northern Kyushu, Japan. *J. Med. Entomol.* **1992**, *29*, 296–304.
- Thavara, U.; Tawatsin, a; Chansang, C.; Kong-ngamsuk, W.; Paosriwong, S.; Boon-Long, J.; Rongsriyam, Y.; Komalamisra, N. Larval occurrence, oviposition behavior and biting activity of potential mosquito vectors of dengue on Samui Island, Thailand. *J. Vector Ecol.* **2001**, *26*, 172–180.
- Bruto, M. d.; Forattini, O.P. Produtividade de criadouros de *Aedes aegypti* no Vale do Paraíba, SP, Brasil. *Rev. saúde pública* **2004**, *38*, 209–215.
- Chan, K.L.; Ho, B.C.; Chan, Y.C. *Aedes aegypti* (L.) and *Aedes albopictus* (Skuse) in Singapore City. 2. Larval habitats. *Bull. World Health Organ.* **1971**, *44*, 629–633.
-

**Table S2.** Typology and number of reported natural containers exploited by *Ae. albopictus* from articles found in PubMed.

| Type of natural container | Number of reported breeding sites                                                                                                                                                                         | References                                                                                                                                                                                                                                                                                                                                                                                   |
|---------------------------|-----------------------------------------------------------------------------------------------------------------------------------------------------------------------------------------------------------|----------------------------------------------------------------------------------------------------------------------------------------------------------------------------------------------------------------------------------------------------------------------------------------------------------------------------------------------------------------------------------------------|
| Bamboo stumps             | 127                                                                                                                                                                                                       |                                                                                                                                                                                                                                                                                                                                                                                              |
|                           | 1                                                                                                                                                                                                         | Delatte, H.; Dehecq, J.S.; Thiria, J.; Domerg, C.; Paupy, C.; Fontenille, D. Geographic Distribution and Developmental Sites of <i>Aedes albopictus</i> (Diptera: Culicidae) During a Chikungunya Epidemic Event. <i>Vector Control Southeast Asia</i> <b>2008</b> , <i>8</i> , 25–34.                                                                                                       |
|                           | 46                                                                                                                                                                                                        | Dev, V. Dengue vectors in urban and suburban Assam, India: entomological observations. <i>WHO South-East Asia J. Public Heal.</i> <b>2014</b> , <i>3</i> , 5838.                                                                                                                                                                                                                             |
|                           | 17                                                                                                                                                                                                        | Edillo, F.E.; Roble, N.D.; Otero, N.D. The key breeding sites by pupal survey for dengue mosquito vectors, <i>Aedes aegypti</i> (Linnaeus) and <i>Aedes albopictus</i> (Skuse), in Guba, Cebu City, Philippines. <i>Southeast Asian J. Trop. Med. Public Health</i> <b>2012</b> , <i>43</i> , 1365–1374.                                                                                     |
|                           | 12                                                                                                                                                                                                        | Gilotra, S.K.; Rozeboom, L.E.; Bhattacharya, N.C. Observations on possible competitive displacement between populations of <i>Aedes aegypti</i> Linnaeus and <i>Aedes albopictus</i> Skuse in Calcutta. <i>Bull. World Health Organ.</i> <b>1967</b> , <i>37</i> , 437–446.                                                                                                                  |
|                           | 21                                                                                                                                                                                                        | Rozeboom, L.E.; Bridges, J.R. Relative population densities of <i>Aedes albopictus</i> and <i>A. guamensis</i> on Guam. <i>Bull. World Health Organ.</i> <b>1972</b> , <i>46</i> , 477–483.                                                                                                                                                                                                  |
|                           | 30                                                                                                                                                                                                        | Sota, T.; Mogi, M.; Hayamizu, E. Seasonal distribution and habitat selection by <i>Aedes albopictus</i> and <i>Aedes riversi</i> (Diptera: Culicidae) in Northern Kyushu, Japan. <i>J. Med. Entomol.</i> <b>1992</b> , <i>29</i> , 296–304.                                                                                                                                                  |
| Bromeliads                | 291                                                                                                                                                                                                       |                                                                                                                                                                                                                                                                                                                                                                                              |
|                           | 3                                                                                                                                                                                                         | Forattini, O.P.; Brito, M. de B. Brief Communication an Unusual Ground Larval Habitat of <i>Aedes albopictus</i> . <i>Rev. Inst. Med. Trop. Sao Paulo</i> <b>1998</b> , <i>40</i> , 121–122.                                                                                                                                                                                                 |
|                           | 275                                                                                                                                                                                                       | Marques, G.R.; Forattini, O.P. <i>Aedes albopictus</i> in soil bromeliads in Ilhabela, coastal area of Southeastern Brazil. <i>Rev Saude Publica</i> <b>2005</b> , <i>39</i> , 548–552.                                                                                                                                                                                                      |
|                           | 7                                                                                                                                                                                                         | Mocellin, M.G.; Simões, T.C.; do Nascimento, T.F.S.; Teixeira, M.L.F.; Lounibos, L.P.; de Oliveira, R.L. Bromeliad-inhabiting mosquitoes in an urban botanical garden of dengue endemic Rio de Janeiro - Are bromeliads productive habitats for the invasive vectors <i>Aedes aegypti</i> and <i>Aedes albopictus</i> ? <i>Mem. Inst. Oswaldo Cruz</i> <b>2009</b> , <i>104</i> , 1171–1176. |
|                           | 5                                                                                                                                                                                                         | Oliveira, V.C. de; Almeida Neto, L.C. de Ocorrência de <i>Aedes aegypti</i> e <i>Aedes albopictus</i> em bromélias cultivadas no Jardim Botânico Municipal de Bauru, São Paulo, Brasil. <i>Cad. Saude Publica</i> <b>2017</b> , <i>33</i> , e00071016.                                                                                                                                       |
| 1                         | O'Meara, G.F.; Cutwa, M.M.; Evans, L.F. Bromeliad-inhabiting mosquitoes in south Florida: native and exotic plants differ in species composition. <i>J. vector Ecol.</i> <b>2003</b> , <i>28</i> , 37–46. |                                                                                                                                                                                                                                                                                                                                                                                              |
| Cacao shells              | 3                                                                                                                                                                                                         |                                                                                                                                                                                                                                                                                                                                                                                              |
|                           | 3                                                                                                                                                                                                         | Simard, F.; Nchoutpouen, E.; Toto, J.C.; Fontenille, D. Geographic distribution and breeding site preference of <i>Aedes albopictus</i> and <i>Aedes aegypti</i> (Diptera: culicidae) in Cameroon, Central Africa. <i>J Med Entomol</i> <b>2005</b> , <i>42</i> , 726–731.                                                                                                                   |
| Coconut shells            | 838                                                                                                                                                                                                       |                                                                                                                                                                                                                                                                                                                                                                                              |
|                           | 8                                                                                                                                                                                                         | Bagny, L.; Delatte, H.; Elissa, N.; Quilici, S.; Fontenille, D.; Adhami, J.; Murati, N.; Adhami, J.; Reiter, P.; Beltrame, A.; et al. <i>Aedes</i> (Diptera: Culicidae) vectors of arboviruses in Mayotte (Indian Ocean): distribution area and larval habitats. <i>J. Med. Entomol.</i> <b>2009</b> , <i>46</i> , 198–207.                                                                  |
|                           | 283                                                                                                                                                                                                       | Banerjee, S.; Aditya, G.; Saha, G.K. Household disposables as breeding habitats of dengue vectors: Linking wastes and public health. <i>Waste Manag.</i> <b>2013</b> , <i>33</i> , 233–239.                                                                                                                                                                                                  |

Table S2. Continued

| Type of natural container | Number of reported breeding sites | References                                                                                                                                                                                                                                                                                                                        |
|---------------------------|-----------------------------------|-----------------------------------------------------------------------------------------------------------------------------------------------------------------------------------------------------------------------------------------------------------------------------------------------------------------------------------|
| Coconut shells            | 838                               |                                                                                                                                                                                                                                                                                                                                   |
|                           | 7                                 | Edillo, F.E.; Roble, N.D.; Otero, N.D. The key breeding sites by pupal survey for dengue mosquito vectors, <i>Aedes aegypti</i> (Linnaeus) and <i>Aedes albopictus</i> (Skuse), in Guba, Cebu City, Philippines. <i>Southeast Asian J. Trop. Med. Public Health</i> <b>2012</b> , <i>43</i> , 1365–1374.                          |
|                           | 144                               | Rao, B.B.; George, B. Breeding patterns of <i>Aedes stegomyia albopictus</i> in periurban areas of Calicut, Kerala, India. <i>Southeast Asian J. Trop. Med. Public Health</i> <b>2010</b> , <i>41</i> , 536–540.                                                                                                                  |
|                           | 36                                | Rozeboom, L.E.; Bridges, J.R. Relative population densities of <i>Aedes albopictus</i> and <i>A. guamensis</i> on Guam. <i>Bull. World Health Organ.</i> <b>1972</b> , <i>46</i> , 477–483.                                                                                                                                       |
|                           | 20                                | Shriram, A.N.; Sivan, A.; Sugunan, A.P. Spatial distribution of <i>Aedes aegypti</i> and <i>Aedes albopictus</i> in relation to geo-ecological features in South Andaman, Andaman and Nicobar Islands, India. <i>Bull. Entomol. Res.</i> <b>2018</b> , <i>108</i> , 166–174.                                                      |
|                           | 1                                 | Simard, F.; Nchoutpouen, E.; Toto, J.C.; Fontenille, D. Geographic distribution and breeding site preference of <i>Aedes albopictus</i> and <i>Aedes aegypti</i> (Diptera: Culicidae) in Cameroon, Central Africa. <i>J Med Entomol</i> <b>2005</b> , <i>42</i> , 726–731.                                                        |
| Dead cow horns            | 316                               | Thavara, U.; Tawatsin, a; Chansang, C.; Kong-ngamsuk, W.; Paosriwong, S.; Boon-Long, J.; Rongsriyam, Y.; Komalamisra, N. Larval occurrence, oviposition behavior and biting activity of potential mosquito vectors of dengue on Samui Island, Thailand. <i>J. Vector Ecol.</i> <b>2001</b> , <i>26</i> , 172–180.                 |
|                           | 22                                | Vijayakumar, K.; Sudheesh Kumar, T.K.; Nujum, Z.T.; Umarul, F.; Kuriakose, A. A study on container breeding mosquitoes with special reference to <i>Aedes</i> ( <i>Stegomyia</i> ) <i>aegypti</i> and <i>Aedes albopictus</i> in Thiruvananthapuram district, India. <i>J. Vector Borne Dis.</i> <b>2014</b> , <i>51</i> , 27–32. |
|                           | 3                                 | Simard, F.; Nchoutpouen, E.; Toto, J.C.; Fontenille, D. Geographic distribution and breeding site preference of <i>Aedes albopictus</i> and <i>Aedes aegypti</i> (Diptera: Culicidae) in Cameroon, Central Africa. <i>J Med Entomol</i> <b>2005</b> , <i>42</i> , 726–731.                                                        |
| Dead leaves               | 3                                 |                                                                                                                                                                                                                                                                                                                                   |
|                           | 5                                 | Simard, F.; Nchoutpouen, E.; Toto, J.C.; Fontenille, D. Geographic distribution and breeding site preference of <i>Aedes albopictus</i> and <i>Aedes aegypti</i> (Diptera: Culicidae) in Cameroon, Central Africa. <i>J Med Entomol</i> <b>2005</b> , <i>42</i> , 726–731.                                                        |
| Ground cavity             | 1                                 | Bagny, L.; Delatte, H.; Elissa, N.; Quilici, S.; Fontenille, D.; Adhami, J.; Murati, N.; Adhami, J.; Reiter, P.; Beltrame, A.; et al. <i>Aedes</i> (Diptera: Culicidae) vectors of arboviruses in Mayotte (Indian Ocean): distribution area and larval habitats. <i>J. Med. Entomol.</i> <b>2009</b> , <i>46</i> , 198–207.       |
|                           | 1                                 | Forattini, O.P.; Brito, M. de B. Brief Communication an Unusual Gground Larval Habitat of <i>Aedes albopictus</i> . <i>Rev. Inst. Med. Trop. Sao Paulo</i> <b>1998</b> , <i>40</i> , 121–122.                                                                                                                                     |
| Hollow log                | 1                                 | Simard, F.; Nchoutpouen, E.; Toto, J.C.; Fontenille, D. Geographic distribution and breeding site preference of <i>Aedes albopictus</i> and <i>Aedes aegypti</i> (Diptera: Culicidae) in Cameroon, Central Africa. <i>J Med Entomol</i> <b>2005</b> , <i>42</i> , 726–731.                                                        |
|                           | 1                                 | Rozeboom, L.E.; Bridges, J.R. Relative population densities of <i>Aedes albopictus</i> and <i>A. guamensis</i> on Guam. <i>Bull. World Health Organ.</i> <b>1972</b> , <i>46</i> , 477–483.                                                                                                                                       |
| Leaf axils                | 16                                |                                                                                                                                                                                                                                                                                                                                   |
|                           | 1                                 | Banerjee, S.; Aditya, G.; Saha, G.K. Household disposables as breeding habitats of dengue vectors: Linking wastes and public health. <i>Waste Manag.</i> <b>2013</b> , <i>33</i> , 233–239.                                                                                                                                       |
|                           | 4                                 | Delatte, H.; Dehecq, J.S.; Thiria, J.; Domerg, C.; Paupy, C.; Fontenille, D. Geographic Distribution and Developmental Sites of <i>Aedes albopictus</i> (Diptera: Culicidae) During a Chikungunya Epidemic Event. <i>Vector Control Southeast Asia</i> <b>2008</b> , <i>8</i> , 25–34.                                            |

Table S2. Continued

| Type of natural container | Number of reported breeding sites | References                                                                                                                                                                                                                                                                                                                                    |
|---------------------------|-----------------------------------|-----------------------------------------------------------------------------------------------------------------------------------------------------------------------------------------------------------------------------------------------------------------------------------------------------------------------------------------------|
| Leaf axils                | 16                                |                                                                                                                                                                                                                                                                                                                                               |
|                           | 6                                 | Dev, V. Dengue vectors in urban and suburban Assam, India: entomological observations. <i>WHO South-East Asia J. Public Heal.</i> <b>2014</b> , <i>3</i> , 5838.                                                                                                                                                                              |
|                           | 1                                 | Edillo, F.E.; Roble, N.D.; Otero, N.D. The key breeding sites by pupal survey for dengue mosquito vectors, <i>Aedes aegypti</i> (Linnaeus) and <i>Aedes albopictus</i> (Skuse), in Guba, Cebu City, Philippines. <i>Southeast Asian J. Trop. Med. Public Health</i> <b>2012</b> , <i>43</i> , 1365–1374.                                      |
|                           | 1                                 | Kamgang, B.; Ngoagouni, C.; Manirakiza, A.; Nakouné, E.; Paupy, C.; Kazanji, M. Temporal Patterns of Abundance of <i>Aedes aegypti</i> and <i>Aedes albopictus</i> (Diptera: Culicidae) and Mitochondrial DNA Analysis of <i>Ae. albopictus</i> in the Central African Republic. <i>PLoS Negl. Trop. Dis.</i> <b>2013</b> , <i>7</i> , e2590. |
|                           | 3                                 | Shriram, A.N.; Sivan, A.; Sugunan, A.P. Spatial distribution of <i>Aedes aegypti</i> and <i>Aedes albopictus</i> in relation to geo-ecological features in South Andaman, Andaman and Nicobar Islands, India. <i>Bull. Entomol. Res.</i> <b>2018</b> , <i>108</i> , 166–174.                                                                  |
| Palm bracts               | 7                                 |                                                                                                                                                                                                                                                                                                                                               |
|                           | 7                                 | Rozeboom, L.E.; Bridges, J.R. Relative population densities of <i>Aedes albopictus</i> and <i>A. guamensis</i> on Guam. <i>Bull. World Health Organ.</i> <b>1972</b> , <i>46</i> , 477–483.                                                                                                                                                   |
| Palm leaves               | 55                                |                                                                                                                                                                                                                                                                                                                                               |
|                           | 55                                | Delatte, H.; Dehecq, J.S.; Thiria, J.; Domerg, C.; Paupy, C.; Fontenille, D. Geographic Distribution and Developmental Sites of <i>Aedes albopictus</i> (Diptera: Culicidae) During a Chikungunya Epidemic Event. <i>Vector Control Southeast Asia</i> <b>2008</b> , <i>8</i> , 25–34.                                                        |
| Puddle                    | 1                                 |                                                                                                                                                                                                                                                                                                                                               |
|                           | 1                                 | Marquetti, M.; Bisset, J.; Leyva, M.; Garcia, A.; Rodriguez, M. Comportamiento estacional y temporal de <i>Aedes aegypti</i> y <i>Aedes albopictus</i> en La Habana, Cuba. <b>2008</b> , <i>60</i> , 62–67.                                                                                                                                   |
| Rock holes                | 49                                |                                                                                                                                                                                                                                                                                                                                               |
|                           | 1                                 | Bagny, L.; Delatte, H.; Elissa, N.; Quilici, S.; Fontenille, D.; Adhami, J.; Murati, N.; Adhami, J.; Reiter, P.; Beltrame, A.; et al. <i>Aedes</i> (Diptera: Culicidae) vectors of arboviruses in Mayotte (Indian Ocean): distribution area and larval habitats. <i>J. Med. Entomol.</i> <b>2009</b> , <i>46</i> , 198–207.                   |
|                           | 33                                | Delatte, H.; Dehecq, J.S.; Thiria, J.; Domerg, C.; Paupy, C.; Fontenille, D. Geographic Distribution and Developmental Sites of <i>Aedes albopictus</i> (Diptera: Culicidae) During a Chikungunya Epidemic Event. <i>Vector Control Southeast Asia</i> <b>2008</b> , <i>8</i> , 25–34.                                                        |
|                           | 8                                 | O'Meara, G.F.; Evans Jr., L.F.; Womack, M.L. Colonization of rock holes by <i>Aedes albopictus</i> in the southeastern United States. <i>J Am Mosq Control Assoc</i> <b>1997</b> , <i>13</i> , 270–274.                                                                                                                                       |
|                           | 3                                 | Pena, C.J.; Gonzalez, G.; Chadee, D.D. Seasonal prevalence and container preferences of <i>Aedes albopictus</i> in Santo Domingo City, Dominican Republic. <i>J. Vector Ecol.</i> <b>2003</b> , <i>28</i> , 208–212.                                                                                                                          |
|                           | 1                                 | Rozeboom, L.E.; Bridges, J.R. Relative population densities of <i>Aedes albopictus</i> and <i>A. guamensis</i> on Guam. <i>Bull. World Health Organ.</i> <b>1972</b> , <i>46</i> , 477–483.                                                                                                                                                   |
|                           | 1                                 | Shriram, A.N.; Sivan, A.; Sugunan, A.P. Spatial distribution of <i>Aedes aegypti</i> and <i>Aedes albopictus</i> in relation to geo-ecological features in South Andaman, Andaman and Nicobar Islands, India. <i>Bull. Entomol. Res.</i> <b>2018</b> , <i>108</i> , 166–174.                                                                  |
|                           | 2                                 | Simard, F.; Nchoutpouen, E.; Toto, J.C.; Fontenille, D. Geographic distribution and breeding site preference of <i>Aedes albopictus</i> and <i>Aedes aegypti</i> (Diptera: culicidae) in Cameroon, Central Africa. <i>J Med Entomol</i> <b>2005</b> , <i>42</i> , 726–731.                                                                    |

Table S2. Continued

| Type of natural container | Number of reported breeding sites                                                                                                                                                                                           | References                                                                                                                                                                                                                                                                                                  |
|---------------------------|-----------------------------------------------------------------------------------------------------------------------------------------------------------------------------------------------------------------------------|-------------------------------------------------------------------------------------------------------------------------------------------------------------------------------------------------------------------------------------------------------------------------------------------------------------|
| Snail shells              | 10                                                                                                                                                                                                                          |                                                                                                                                                                                                                                                                                                             |
|                           | 9                                                                                                                                                                                                                           | Rozeboom, L.E.; Bridges, J.R. Relative population densities of <i>Aedes albopictus</i> and <i>A. guamensis</i> on Guam. <i>Bull. World Health Organ.</i> 1972, 46, 477–483.                                                                                                                                 |
|                           | 1                                                                                                                                                                                                                           | Simard, F.; Nchoutpouen, E.; Toto, J.C.; Fontenille, D. Geographic distribution and breeding site preference of <i>Aedes albopictus</i> and <i>Aedes aegypti</i> (Diptera: culicidae) in Cameroon, Central Africa. <i>J Med Entomol</i> 2005, 42, 726–731.                                                  |
| Tree holes                | 125                                                                                                                                                                                                                         |                                                                                                                                                                                                                                                                                                             |
|                           | 1                                                                                                                                                                                                                           | Bagny, L.; Delatte, H.; Elissa, N.; Quilici, S.; Fontenille, D.; Adhami, J.; Murati, N.; Adhami, J.; Reiter, P.; Beltrame, A.; et al. <i>Aedes</i> (Diptera: Culicidae) vectors of arboviruses in Mayotte (Indian Ocean): distribution area and larval habitats. <i>J. Med. Entomol.</i> 2009, 46, 198–207. |
|                           | 32                                                                                                                                                                                                                          | Gomes, A.; Forattini, O.; Kakitani, I.; Marques, G.; Marques, C.; Marucci, D.; Brito, M. Microhabitats de <i>Aedes albopictus</i> (Skuse) na região do Vale do Paraíba, Estado de São Paulo, Brasil. <i>Rev. Saúde Pública S. Paulo</i> 1992, 26, 108–118.                                                  |
|                           | 1                                                                                                                                                                                                                           | Delatte, H.; Dehecq, J.S.; Thiria, J.; Domerg, C.; Paupy, C.; Fontenille, D. Geographic Distribution and Developmental Sites of <i>Aedes albopictus</i> (Diptera: Culicidae) During a Chikungunya Epidemic Event. <i>Vector Control Southeast Asia</i> 2008, 8, 25–34.                                      |
|                           | 12                                                                                                                                                                                                                          | Müller, G.C.; Kravchenko, V.D.; Junnila, A.; Schlein, Y. Tree-hole breeding mosquitoes in Israel. <i>J. Vector Ecol.</i> 2012, 37, 102–109.                                                                                                                                                                 |
|                           | 5                                                                                                                                                                                                                           | O'Meara, G.F.; Evans Jr., L.F.; Womack, M.L. Colonization of rock holes by <i>Aedes albopictus</i> in the southeastern United States. <i>J Am Mosq Control Assoc</i> 1997, 13, 270–274.                                                                                                                     |
|                           | 13                                                                                                                                                                                                                          | Rozeboom, L.E.; Bridges, J.R. Relative population densities of <i>Aedes albopictus</i> and <i>A. guamensis</i> on Guam. <i>Bull. World Health Organ.</i> 1972, 46, 477–483.                                                                                                                                 |
|                           | 26                                                                                                                                                                                                                          | Shriram, A.N.; Sivan, A.; Sugunan, A.P. Spatial distribution of <i>Aedes aegypti</i> and <i>Aedes albopictus</i> in relation to geo-ecological features in South Andaman, Andaman and Nicobar Islands, India. <i>Bull. Entomol. Res.</i> 2018, 108, 166–174.                                                |
|                           | 2                                                                                                                                                                                                                           | Simard, F.; Nchoutpouen, E.; Toto, J.C.; Fontenille, D. Geographic distribution and breeding site preference of <i>Aedes albopictus</i> and <i>Aedes aegypti</i> (Diptera: culicidae) in Cameroon, Central Africa. <i>J Med Entomol</i> 2005, 42, 726–731.                                                  |
|                           | 8                                                                                                                                                                                                                           | Sivan, A.; Shriram, A.N.; Sugunan, A.P.; Anwesh, M.; Muruganandam, N.; Kartik, C.; Vijayachari, P. Natural transmission of dengue virus serotype 3 by <i>Aedes albopictus</i> (Skuse) during an outbreak in Havelock Island: Entomological characteristics. <i>Acta Trop.</i> 2016, 156, 122–129.           |
| 16                        | Sota, T.; Mogi, M.; Hayamizu, E. Seasonal distribution and habitat selection by <i>Aedes albopictus</i> and <i>Aedes riversi</i> (Diptera: Culicidae) in Northern Kyushu, Japan. <i>J. Med. Entomol.</i> 1992, 29, 296–304. |                                                                                                                                                                                                                                                                                                             |
| 9                         | Urbinate, P.R.; Menezes, R.M.T.; Natal, D. Sazonalidade de <i>Aedes albopictus</i> em área protegida na cidade de São Paulo, Brasil. <i>Rev. Saude Publica</i> 2007, 41, 478–481.                                           |                                                                                                                                                                                                                                                                                                             |

**Table S3:** List of references used to analyse the host feeding preferences of *Aedes albopictus*.

| References                                                                                                                                                                                                                                                                                                                                                |
|-----------------------------------------------------------------------------------------------------------------------------------------------------------------------------------------------------------------------------------------------------------------------------------------------------------------------------------------------------------|
| Almeida, P.; Baptista, S.; Sousa, C.; Novo, T.; Ramos, H.; Panella, N.; Godsey, M.; Simões, M.J.; Anselmo, M.L.; Komar, N.; et al. Bioecology and Vectorial Capacity of <i>Aedes albopictus</i> (Diptera: Culicidae) in Macao, China, in Relation to Dengue Virus Transmission. <i>J. Med. Entomol.</i> <b>2005</b> , <i>42</i> , 419–428.                |
| Colless, D.H. Notes on the culicine mosquitoes of singapore. <i>Ann. Trop. Med. Parasitol.</i> <b>1959</b> , <i>51</i> , 87–101.                                                                                                                                                                                                                          |
| Dennett, J. a; Bala, A.; Wuithiranyagool, T.; Randle, Y.; Sargent, C.B.; Guzman, H.; Siirin, M.; Hassan, H.K.; Reyna-Nava, M.; Unnasch, T.R.; et al. Associations between two mosquito populations and West Nile virus in Harris County, Texas, 2003-06. <i>J. Am. Mosq. Control Assoc.</i> <b>2007</b> , <i>23</i> , 264–275.                            |
| Pereira dos Santos, T.; Roiz, D.; de Abreu, F.; Luz Bessa, S.; Santa Lucia, M.; Jiolle, D.; Neves, N.; Simard, F.; Lourenço De Oliveira, R.; Paupy, C. Potential of <i>Aedes albopictus</i> as a bridge vector for zoonotic pathogens at the urban-forest interface of Brazil. <i>Emerg. Microbes Infect.</i> <b>2018</b> , <i>7</i> , 191.               |
| Faraji, A.; Egizi, A.; Fonseca, D.M.; Unlu, I.; Crepeau, T.; Healy, S.P.; Gaugler, R. Comparative Host Feeding Patterns of the Asian Tiger Mosquito, <i>Aedes albopictus</i> , in Urban and Suburban Northeastern USA and Implications for Disease Transmission. <i>PLoS Negl. Trop. Dis.</i> <b>2014</b> , <i>8</i> , e3037.                             |
| Gingrich, J.B.; Williams, G.M. Host-feeding patterns of suspected West Nile virus mosquito vectors in Delaware, 2001-2002. <i>J. Am. Mosq. Control Assoc.</i> <b>2005</b> , <i>21</i> , 194–200.                                                                                                                                                          |
| Gomes, A.; Silva, N.; Marques, G.; Brito, M. Host-feeding patterns of potential human disease vectors in the Paraiba Valley Region, State of Sao Paulo, Brazil 2002, 28: 74–78.                                                                                                                                                                           |
| Kamgang, B.; Nchoutpouen, E.; Simard, F.; Paupy, C. Notes on the blood-feeding behavior of <i>Aedes albopictus</i> (Diptera: Culicidae) in Cameroon. <i>Parasit. Vectors</i> <b>2012</b> , <i>5</i> , 57.                                                                                                                                                 |
| Kek, R.; Hapuarachchi, H.C.; Chung, C.-Y.; Humaidi, M. Bin; Razak, M.A.B.A.; Chiang, S.; Lee, C.; Tan, C.-H.; Yap, G.; Chong, C.-S.; et al. Feeding Host Range of <i>Aedes albopictus</i> (Diptera: Culicidae) Demonstrates Its Opportunistic Host-Seeking Behavior in Rural Singapore. <i>J. Med. Entomol.</i> <b>2014</b> , <i>51</i> , 880–884.        |
| Kim, K.S.; Tsuda, Y.; Yamada, A. Bloodmeal Identification and Detection of Avian Malaria Parasite From Mosquitoes (Diptera: Culicidae) Inhabiting Coastal Areas of Tokyo Bay, Japan. <i>J. Med. Entomol.</i> <b>2009</b> , <i>46</i> , 1230–1234.                                                                                                         |
| Kim, H.; Yu, H. mi; Lim, H.W.; Yang, S.C.; Roh, J.Y.; Chang, K.S.; Shin, E.H.; Ju, Y.R.; Lee, W.G. Host-feeding pattern and dengue virus detection of <i>Aedes albopictus</i> (Diptera: Culicidae) captured in an urban park in Korea. <i>J. Asia. Pac. Entomol.</i> <b>2017</b> , <i>20</i> , 809–813.                                                   |
| Muñoz, J.; Eritja, R.; Alcaide, M.; Montalvo, T.; Soriguer, R.C.; Figuerola, J. Host-Feeding Patterns of Native <i>Culex pipiens</i> and Invasive <i>Aedes albopictus</i> Mosquitoes (Diptera: Culicidae) in Urban Zones From Barcelona, Spain. <i>J. Med. Entomol.</i> <b>2011</b> , <i>48</i> , 956–960.                                                |
| Niebylski, M.L.; Savage, H.M.; Nasci, R.S.; Craig, G.B. Blood hosts of <i>Aedes albopictus</i> in the United States. <i>J. Am. Mosq. Control Assoc.</i> <b>1994</b> , <i>10</i> , 447–450.                                                                                                                                                                |
| Ponlawat, A.; Harrington, L.C. Blood Feeding Patterns of <i>Aedes aegypti</i> and <i>Aedes albopictus</i> in Thailand. <i>J. Med. Entomol.</i> <b>2005</b> , <i>42</i> , 844–849.                                                                                                                                                                         |
| Richards, S.L.; Ponnusamy, L.; Unnasch, T.R.; Hassan, H.K.; Apperson, C.S. Host-Feeding Patterns of <i>Aedes albopictus</i> (Diptera: Culicidae) in Relation to Availability of Human and Domestic Animals in Suburban Landscapes of Central North Carolina. <i>J. Med. Entomol.</i> <b>2006</b> , <i>43</i> , 543–551.                                   |
| Savage, H.; Niebylski, M.; Smith, G.; Mitchell, C.; Craig, G. Host-feeding patterns of <i>Aedes albopictus</i> (Diptera: Culicidae) at a temperate North American site. <i>J. Med. Entomol.</i> <b>1993</b> , <i>30</i> , 27–34.                                                                                                                          |
| Sawabe, K.; Isawa, H.; Hoshino, K.; Sasaki, T.; Roychoudhury, S.; Higa, Y.; Kasai, S.; Tsuda, Y.; Nishiumi, I.; Hisai, N.; et al. Host-Feeding Habits of <i>Culex pipiens</i> and <i>Aedes albopictus</i> (Diptera: Culicidae) Collected at the Urban and Suburban Residential Areas of Japan. <i>J. Med. Entomol.</i> <b>2010</b> , <i>47</i> , 442–450. |
| Sivan, A.; Shriram, A.; Sunish, I.; Vidhya, P. Host-feeding pattern of <i>Aedes aegypti</i> and <i>Aedes albopictus</i> (Diptera: Culicidae) in heterogeneous landscapes of South Andaman, Andaman and Nicobar Islands, India. <i>Parasitol. Res.</i> <b>2015</b> , <i>114</i> , 3539–3546.                                                               |
| Tandon, N.; Ray, S. Host feeding pattern of <i>Aedes aegypti</i> and <i>Aedes albopictus</i> in Kolkata, India. <i>Denuge Bull.</i> <b>2000</b> , <i>24</i> , 117–120.                                                                                                                                                                                    |
| Tempelis, C.H.; Hayes, R.O.; Hess, A.D.; Reeves, W.C. Blood-feeding habits of four species of mosquito found in Hawaii. <i>Am. J. Trop. Med. Hyg.</i> <b>1970</b> , <i>19</i> , 335–341.                                                                                                                                                                  |
| Valerio, L.; Francesca, M.; Bongiorno, G.; Facchinelli, L.; Pombi, M.; Caputo, B.; Maroli, M.; Torre, A. Della Host-Feeding Patterns of <i>Aedes albopictus</i> . <b>2010</b> , <i>10</i> , 291–294.                                                                                                                                                      |
| Egizi, A.; Healy, S.P.; Fonseca, D.M. Rapid blood meal scoring in anthropophilic <i>Aedes albopictus</i> and application of PCR blocking to avoid pseudogenes. <i>Infect. Genet. Evol.</i> <b>2013</b> , <i>16</i> , 122–128.                                                                                                                             |

**Table S4:** List of references that reported infection, infections rate, dissemination rate, dissemination efficiency, transmissions rate, transmission efficiency or transovarial transmission in *Ae. albopictus* for the indicated arboviruses.

| Virus Name                       | References                                                                                                                                                                                                                                                                                                                                                                                                                                                                                                                                                                                                                                                                                                                                                                                                                                                                                                                                                                                                                                    |
|----------------------------------|-----------------------------------------------------------------------------------------------------------------------------------------------------------------------------------------------------------------------------------------------------------------------------------------------------------------------------------------------------------------------------------------------------------------------------------------------------------------------------------------------------------------------------------------------------------------------------------------------------------------------------------------------------------------------------------------------------------------------------------------------------------------------------------------------------------------------------------------------------------------------------------------------------------------------------------------------------------------------------------------------------------------------------------------------|
| Arumowot                         | Tesh, R.B. Multiplication Phlebotomus phlebotomus fever group arboviruses in mosquitoes after intrathoracic inoculation. <i>J. Med. Entomol.</i> <b>1975</b> , <i>12</i> , 1–4.                                                                                                                                                                                                                                                                                                                                                                                                                                                                                                                                                                                                                                                                                                                                                                                                                                                               |
| BeAn 100049 (Urucuri)            | Tesh, R.B. Multiplication Phlebotomus phlebotomus fever group arboviruses in mosquitoes after intrathoracic inoculation. <i>J. Med. Entomol.</i> <b>1975</b> , <i>12</i> , 1–4.                                                                                                                                                                                                                                                                                                                                                                                                                                                                                                                                                                                                                                                                                                                                                                                                                                                               |
| Bujaru                           | Tesh, R.B. Multiplication Phlebotomus phlebotomus fever group arboviruses in mosquitoes after intrathoracic inoculation. <i>J. Med. Entomol.</i> <b>1975</b> , <i>12</i> , 1–4.                                                                                                                                                                                                                                                                                                                                                                                                                                                                                                                                                                                                                                                                                                                                                                                                                                                               |
| Bussuquara                       | Tesh, R.B.; Shroyer, D.A. The mechanism of arbovirus transovarial transmission in mosquitoes: San Angelo virus in <i>Aedes albopictus</i> . <i>Am. J. Trop. Med. Hyg.</i> <b>1980</b> , <i>29</i> , 1394–1404.                                                                                                                                                                                                                                                                                                                                                                                                                                                                                                                                                                                                                                                                                                                                                                                                                                |
| Cache Valley                     | Armstrong, P.M.; Anderson, J.F.; Farajollahi, A.; Healy, S.P.; Unlu, I.; Crepeau, T.N.; Gaugler, R.; Fonseca, D.M.; Andreadis, T.G. Isolations of Cache Valley virus from <i>Aedes albopictus</i> (Diptera: Culicidae) in New Jersey and evaluation of its role as a regional arbovirus vector. <i>J. Med. Entomol.</i> <b>2013</b> , <i>50</i> , 1310–1314.                                                                                                                                                                                                                                                                                                                                                                                                                                                                                                                                                                                                                                                                                  |
| Chandipura                       | Ramachandra, R.; Sing, K.; Dhanda, V.; Bhattacharya, N. Experimental transmission of Chandipura Virus by mosquitoes. <i>Ind. Jour. Med. Res.</i> <b>1967</b> , <i>55</i> , 1306–1310.                                                                                                                                                                                                                                                                                                                                                                                                                                                                                                                                                                                                                                                                                                                                                                                                                                                         |
| Chilibre                         | Tesh, R.B. Multiplication Phlebotomus phlebotomus fever group arboviruses in mosquitoes after intrathoracic inoculation. <i>J. Med. Entomol.</i> <b>1975</b> , <i>12</i> , 1–4.                                                                                                                                                                                                                                                                                                                                                                                                                                                                                                                                                                                                                                                                                                                                                                                                                                                               |
| Eastern equine encephalomyelitis | Mitchell, C.J.; McLean, R.G.; Nasci, R.S.; Crans, W.J.; Smith, G.C.; Caccamise, D.F. Susceptibility parameters of <i>Aedes albopictus</i> to per oral infection with eastern equine encephalitis virus. <i>J Med Entomol</i> <b>1993</b> , <i>30</i> , 233–235.<br>Moncayo, a C.; Edman, J.D.; Turell, M.J. Effect of eastern equine encephalomyelitis virus on the survival of <i>Aedes albopictus</i> , <i>Anopheles quadrimaculatus</i> , and <i>Coquilletidia perturbans</i> (Diptera: Culicidae). <i>J. Med. Entomol.</i> <b>2000</b> , <i>37</i> , 701–706.<br>Scott, T.W.; Lorenz, L.H.; Weaver, S.C. Susceptibility of <i>Aedes albopictus</i> to infection with eastern equine encephalomyelitis virus. <i>J. Am. Mosq. Control Assoc.</i> <b>1990</b> , <i>6</i> , 274–278.<br>Turell, M.; Beaman, J.; Neely, G. Experimental transmission of Eastern equine encephalitis virus by strains of <i>Aedes albopictus</i> and <i>A. taeniorhynchus</i> (Diptera: Culicidae). <i>J. Med. Entomol.</i> <b>1994</b> , <i>31</i> , 287–290. |
| Getah                            | Takashima, I.; Hashimoto, N. Getah virus in several species of mosquitoes. <i>Trans. R. Soc. Trop. Med. Hyg.</i> <b>1985</b> , <i>79</i> , 546–550.                                                                                                                                                                                                                                                                                                                                                                                                                                                                                                                                                                                                                                                                                                                                                                                                                                                                                           |
| Icoaraci                         | Tesh, R.B. Multiplication Phlebotomus phlebotomus fever group arboviruses in mosquitoes after intrathoracic inoculation. <i>J. Med. Entomol.</i> <b>1975</b> , <i>12</i> , 1–4.                                                                                                                                                                                                                                                                                                                                                                                                                                                                                                                                                                                                                                                                                                                                                                                                                                                               |
| Ilheus                           | Tesh, R.B. Experimental studies on the transovarial transmission of Kunjin and San Angelo viruses in mosquitoes. <i>Am. J. Trop. Med. Hyg.</i> <b>1980</b> , <i>29</i> , 657–666.                                                                                                                                                                                                                                                                                                                                                                                                                                                                                                                                                                                                                                                                                                                                                                                                                                                             |
| Itaporanga                       | Tesh, R.B. Multiplication Phlebotomus phlebotomus fever group arboviruses in mosquitoes after intrathoracic inoculation. <i>J. Med. Entomol.</i> <b>1975</b> , <i>12</i> , 1–4.                                                                                                                                                                                                                                                                                                                                                                                                                                                                                                                                                                                                                                                                                                                                                                                                                                                               |
| Jamestown Canyon                 | Grimstad, P.R. Recently Introduced <i>Aedes albopictus</i> in the United States: Potential vector of La Crosse Virus (Bunyaviridae: California Serogroup)1. <b>1989</b> , <i>5</i> , 422–427.                                                                                                                                                                                                                                                                                                                                                                                                                                                                                                                                                                                                                                                                                                                                                                                                                                                 |
| Japanese encephalitis            | Rosen, L.; Tesh, R.B.; Lien, J.; John, H. Transovarial Transmission of Japanese Encephalitis Virus by Mosquitoes. <i>Am. Assoc. Adv. Sci.</i> <b>1978</b> , <i>199</i> , 909–911.<br>Tesh, R.B. Experimental studies on the transovarial transmission of Kunjin and San Angelo viruses in mosquitoes. <i>Am. J. Trop. Med. Hyg.</i> <b>1980</b> , <i>29</i> , 657–666.<br>Weng, M.H.; Lien, J.C.; Wang, Y.M.; Wu, H.L.; Chin, C. Susceptibility of three laboratory strains of <i>Aedes albopictus</i> (Diptera: Culicidae) to Japanese encephalitis virus from Taiwan. <i>J Med Entomol</i> <b>1997</b> , <i>34</i> , 745–747.                                                                                                                                                                                                                                                                                                                                                                                                               |
| Karimabad                        | Wispelaere, M.; Desprès, P.; Choumet, V. European <i>Aedes albopictus</i> and <i>Culex pipiens</i> Are Competent Vectors for Japanese Encephalitis Virus. <i>PLoS Negl. Trop. Dis.</i> <b>2017</b> , <i>11</i> , e0005294.                                                                                                                                                                                                                                                                                                                                                                                                                                                                                                                                                                                                                                                                                                                                                                                                                    |
| Keystone                         | Tesh, R.B. Multiplication Phlebotomus phlebotomus fever group arboviruses in mosquitoes after intrathoracic inoculation. <i>J. Med. Entomol.</i> <b>1975</b> , <i>12</i> , 1–4.<br>Grimstad, P.R. Recently Introduced <i>Aedes albopictus</i> in the United States: Potential vector of La Crosse Virus (Bunyaviridae: California Serogroup)1. <b>1989</b> , <i>5</i> , 422–427.                                                                                                                                                                                                                                                                                                                                                                                                                                                                                                                                                                                                                                                              |

Table S4. Continued

| Virus Name  | References                                                                                                                                                                                                                                                                                                                                                                                                                                                                                                                                                                                                                                                                                                                                                                                                                                                                                |
|-------------|-------------------------------------------------------------------------------------------------------------------------------------------------------------------------------------------------------------------------------------------------------------------------------------------------------------------------------------------------------------------------------------------------------------------------------------------------------------------------------------------------------------------------------------------------------------------------------------------------------------------------------------------------------------------------------------------------------------------------------------------------------------------------------------------------------------------------------------------------------------------------------------------|
| Keystone    | Tesh, R.B. Experimental studies on the transovarial transmission of Kunjin and San Angelo viruses in mosquitoes. <i>Am. J. Trop. Med. Hyg.</i> <b>1980</b> , <i>29</i> , 657–666.                                                                                                                                                                                                                                                                                                                                                                                                                                                                                                                                                                                                                                                                                                         |
| kokobera    | Tesh, R.B. Experimental studies on the transovarial transmission of Kunjin and San Angelo viruses in mosquitoes. <i>Am. J. Trop. Med. Hyg.</i> <b>1980</b> , <i>29</i> , 657–666.                                                                                                                                                                                                                                                                                                                                                                                                                                                                                                                                                                                                                                                                                                         |
| Kunjin      | Tesh, R.B. Experimental studies on the transovarial transmission of Kunjin and San Angelo viruses in mosquitoes. <i>Am. J. Trop. Med. Hyg.</i> <b>1980</b> , <i>29</i> , 657–666.<br>Cully Jr., J.F.; Streit, T.G.; Heard, P.B. Transmission of La Crosse virus by four strains of <i>Aedes albopictus</i> to and from the eastern chipmunk ( <i>Tamias striatus</i> ). <i>J Am Mosq Control Assoc</i> <b>1992</b> , <i>8</i> , 237–240.<br>Grimstad, P.R. Recently Introduced <i>Aedes albopictus</i> in the United States: Potential vector of La Crosse Virus (Bunyaviridae: California Serogroup)1. <b>1989</b> , <i>5</i> , 422–427.                                                                                                                                                                                                                                                 |
| La Crosse   | Hughes, M.T.; Gonzalez, J.A.; Reagan, K.L.; Carol, D.; Beaty, B.J.; Beaty, B.J. Comparative Potential of <i>Aedes triseriatus</i> , <i>Aedes albopictus</i> , and <i>Aedes aegypti</i> (Diptera: Culicidae) to Transovarially Transmit La Crosse Virus Comparative Potential of <i>Aedes triseriatus</i> , <i>Aedes albopictus</i> , and <i>Aedes aegypti</i> (Diptera: Culicidae). <i>Entomol. Soc. Am.</i> <b>2006</b> , <i>43</i> , 757–761.<br>Lambert, A.J.; Blair, C.D.; D’Anton, M.; Ewing, W.; Harborth, M.; Seiferth, R.; Xiang, J.; Lanciotti, R.S. La Crosse Virus in <i>Aedes albopictus</i> Mosquitoes, Texas, USA, 2009. <i>Emerg. Infect. Dis.</i> <b>2010</b> , <i>16</i> , 856–858.<br>Tesh, R.B. Experimental studies on the transovarial transmission of Kunjin and San Angelo viruses in mosquitoes. <i>Am. J. Trop. Med. Hyg.</i> <b>1980</b> , <i>29</i> , 657–666. |
| Mayaro      | Smith, G.C.; Francly, D.B. Laboratory studies of a Brazilian strain of <i>Aedes albopictus</i> as a potential vector of Mayaro and Oropouche viruses. <i>J Am Mosq Control Assoc</i> <b>1991</b> , <i>7</i> , 89–93.                                                                                                                                                                                                                                                                                                                                                                                                                                                                                                                                                                                                                                                                      |
| Oropouche   | Smith, G.C.; Francly, D.B. Laboratory studies of a Brazilian strain of <i>Aedes albopictus</i> as a potential vector of Mayaro and Oropouche viruses. <i>J Am Mosq Control Assoc</i> <b>1991</b> , <i>7</i> , 89–93.                                                                                                                                                                                                                                                                                                                                                                                                                                                                                                                                                                                                                                                                      |
| Orungo      | Tomori, O.; Aitken, T.H. Orungo virus: transmission studies with <i>Aedes albopictus</i> and <i>Aedes aegypti</i> (Diptera: Culicidae). <i>J Med Entomol</i> <b>1978</b> , <i>14</i> , 523–526.                                                                                                                                                                                                                                                                                                                                                                                                                                                                                                                                                                                                                                                                                           |
| Pacui       | Tesh, R.B. Multiplication <i>Phlebotomus phlebotomus</i> fever group arboviruses in mosquitoes after intrathoracic inoculation. <i>J. Med. Entomol.</i> <b>1975</b> , <i>12</i> , 1–4.<br>Francly, D.; Krabatsos, N.; Wesson, C.; Moore, J.; Lazuiick, J.; Niebylski, T.; Tsai, T.; Craig, J. A new Arbovirus from <i>Aedes albopictus</i> , an Asian mosquito Established in the United States. <i>Science (80- )</i> . <b>1990</b> , <i>250</i> , 1738–1740.                                                                                                                                                                                                                                                                                                                                                                                                                            |
| Potosi      | Heard, P.B.; Niebylski, M.L.; Francly, D.B. Transmission of a Newly Recognized Virus (Bunyaviridae, Bunyavirus) Isolated from <i>Aedes albopictus</i> (Diptera: Culicidae) in Potosi, Missouri. <i>J. Med. Entomol.</i> <b>1991</b> , <i>28</i> , 601–605.<br>Mitchell, C.J.; Smith, G.C.; Miller, B.R. Vector Competence of <i>Aedes Albopictus</i> for a Newly Recognized Bunyavirus From Mosquitoes Collected in Potosi, Missouri1. <i>J. Am. Mosq. Control Assoc.</i> <b>1990</b> , <i>6</i> , 523–527.                                                                                                                                                                                                                                                                                                                                                                               |
| Rift Valley | Brustolin, M.; Talavera, S.; Nunez, A.; Santamaría, C.; Rivas, R.; Pujol, N.; Valle, M.; Verdun, M.; Brun, A.; Pages, N.; et al. Rift Valley fever virus and European mosquitoes: vector competence of <i>Culex pipiens</i> and <i>Stegomyia albopicta</i> (= <i>Aedes albopictus</i> ). <i>Med. Vet. Entomol.</i> <b>2017</b> , <i>31</i> , 365–372.<br>Turell, M.J.; Bailey, C.L.; Beaman, J.R. Vector competence of a Houston, Texas strain of <i>Aedes albopictus</i> for Rift Valley fever virus. <i>J. Am. Mosq. Control Assoc.</i> <b>1988</b> , <i>4</i> , 94–96.<br>Mitchell, C.J.; Gubler, D.J. Vector competence of geographic strains of <i>Aedes albopictus</i> and <i>Aedes polynesiensis</i> and certain other <i>Aedes</i> ( <i>Stegomyia</i> ) mosquitoes for Ross River virus. <i>J Am Mosq Control Assoc</i> <b>1987</b> , <i>3</i> , 142–147.                         |
| Ross River  | Mitchell, C.J.; Miller, B.R.; Gubler, D.J. Vector competence of <i>Aedes albopictus</i> from Houston, Texas, for dengue serotypes 1 to 4, yellow fever and Ross River viruses. <i>J. Am. Mosq. Control Assoc.</i> <b>1987</b> , <i>3</i> , 460–465.                                                                                                                                                                                                                                                                                                                                                                                                                                                                                                                                                                                                                                       |
| Salehabad   | Tesh, R.B. Multiplication <i>Phlebotomus phlebotomus</i> fever group arboviruses in mosquitoes after intrathoracic inoculation. <i>J. Med. Entomol.</i> <b>1975</b> , <i>12</i> , 1–4.<br>Shroyer, D.A. Transovarial Maintenance of San Angelo Virus in Sequential Generations of <i>Aedes albopictus</i> . <i>Am J Trop Med Hyg.</i> <b>1986</b> , <i>35</i> , 408–417.                                                                                                                                                                                                                                                                                                                                                                                                                                                                                                                  |
| San Angelo  | Tesh, R.B. Experimental studies on the transovarial transmission of Kunjin and San Angelo viruses in mosquitoes. <i>Am. J. Trop. Med. Hyg.</i> <b>1980</b> , <i>29</i> , 657–666.<br>Tesh, R.B. Multiplication <i>Phlebotomus phlebotomus</i> fever group arboviruses in mosquitoes after intrathoracic inoculation. <i>J. Med. Entomol.</i> <b>1975</b> , <i>12</i> , 1–4.                                                                                                                                                                                                                                                                                                                                                                                                                                                                                                               |



Table S4. Continued

| Virus Name                     | References                                                                                                                                                                                                                                                                                                                                                         |
|--------------------------------|--------------------------------------------------------------------------------------------------------------------------------------------------------------------------------------------------------------------------------------------------------------------------------------------------------------------------------------------------------------------|
| Tensaw Virus                   | Mitchell, C.J. Vector competence of North and South American strains of <i>Aedes albopictus</i> for certain arboviruses: a review. <i>J. Am. Mosq. Control Assoc.</i> <b>1991</b> , <i>7</i> , 446–451.                                                                                                                                                            |
| Trivittatus Virus              | Grimstad, P.R. Recently Introduced <i>Aedes albopictus</i> in the United States: Potential vector of La Crosse Virus (Bunyaviridae: California Serogroup)1. <b>1989</b> , <i>5</i> , 422–427.                                                                                                                                                                      |
| Uganda S                       | Tesh, R.B. Experimental studies on the transovarial transmission of Kunjin and San Angelo viruses in mosquitoes. <i>Am. J. Trop. Med. Hyg.</i> <b>1980</b> , <i>29</i> , 657–666.                                                                                                                                                                                  |
| Usutu virus                    | Puggioli, A.; Bonilauri, P.; Calzolari, M.; Lelli, D.; Carrieri, M.; Urbanelli, S.; Pudar, D.; Bellini, R. Does <i>Aedes albopictus</i> (Diptera: Culicidae) play any role in Usutu virus transmission in Northern Italy? Experimental oral infection and field evidences. <i>Acta Trop.</i> <b>2017</b> , <i>172</i> , 192–196.                                   |
| Venezuelan equine encephalitis | Beaman, J.R.; Turell, M.J. Transmission of Venezuelan Equine Encephalomyelitis Virus by Strains of <i>Aedes albopictus</i> (Diptera: Culicidae) Collected from North and South America. <i>J. Med. Entomol.</i> <b>1991</b> , <i>28</i> , 161–164.                                                                                                                 |
|                                | Fernandez, Z.; Moncayo, A.C.; Carrara, A.S.; Forattini, O.P.; Weaver, A.S.C. Vector Competence of Rural and Urban Strains of <i>Aedes</i> ( <i>Stegomyia</i> ) <i>albopictus</i> (Diptera: Culicidae) from São Paulo State, Brazil for IC, ID, and IF Subtypes of Venezuelan Equine Encephalitis Virus. <i>J. Med. Entomol.</i> <b>2003</b> , <i>40</i> , 522–527. |
|                                | Turell, M.J.; Beaman, J.R. Experimental Transmission of Venezuelan Equine Encephalomyelitis Virus by a strain of <i>Aedes albopictus</i> (Diptera: Culicidae) from New Orleans, Louisiana. <i>J. Med. Entomol.</i> <b>1992</b> , <i>29</i> , 802–807.                                                                                                              |
| West Nile                      | Baqar, S.; Hayes, C.G.; Murphy, J.R.; Watts, D.M. Vertical transmission of West Nile virus by <i>Culex</i> and <i>Aedes</i> species mosquitoes. <i>Am. J. Trop. Med. Hyg.</i> <b>1993</b> , <i>48</i> , 757–762.                                                                                                                                                   |
|                                | Brustolin, M.; Talavera, S.; Santamaría, C.; Rivas, R.; Pujol, N.; Aranda, C.; Marquès, E.; Valle, M.; Verdún, M.; Pagès, N.; et al. <i>Culex pipiens</i> and <i>Stegomyia albopicta</i> (= <i>Aedes albopictus</i> ) populations as vectors for lineage 1 and 2 West Nile virus in Europe. <i>Med. Vet. Entomol.</i> <b>2016</b> , <i>30</i> , 166–173.           |
|                                | Cupp, E.W.; Hassan, H.K.; Yue, X.; Oldland, W.K.; Lilley, B.M.; Unnasch, T.R. West Nile Virus Infection in Mosquitoes in the Mid-South USA, 2002–2005. <i>J. Med. Entomol.</i> <b>2007</b> , <i>44</i> , 117–125.                                                                                                                                                  |
|                                | Farajollahi, A.; Kesavaraju, B.; Price, D.C.; Williams, G.M.; Healy, S.P.; Gaugler, R.; Nelder, M.P. Field efficacy of BG-Sentinel and industry-standard traps for <i>Aedes albopictus</i> (Diptera: Culicidae) and West Nile virus surveillance. <i>J. Med. Entomol.</i> <b>2009</b> , <i>46</i> , 919–25.                                                        |
|                                | Fortuna, C.; Remoli, M.E.; Severini, F.; Di Luca, M.; Toma, L.; Fois, F.; Bucci, P.; Boccolini, D.; Romi, R.; Ciufolini, M.G. Evaluation of vector competence for West Nile virus in Italian <i>Stegomyia albopicta</i> (= <i>Aedes albopictus</i> ) mosquitoes. <i>Med. Vet. Entomol.</i> <b>2015</b> , <i>29</i> , 430–433.                                      |
|                                | Holick, J.; Kyle, A.; Ferraro, W.; Delaney, R.; Marta, I. Discovery of <i>Aedes albopictus</i> infected with west nile virus in Southeastern Pennsylvania. <i>J. Am. Mosq. Control Assoc. INC.</i> <b>2002</b> , <i>18</i> , 131.                                                                                                                                  |
|                                | Philip, C.B.; Smadel, J.E. Transmission of West Nile Virus by Infected <i>Aedes albopictus</i> . <i>C. Proc Soc Exper Biol Med</i> <b>1943</b> , <i>53</i> , 49–50.                                                                                                                                                                                                |
|                                | Sardelis, M.R.; Turell, M.J.; Guinn, M.L.O.; Andre, R.G.; Roberts, D.R. Vector Competence of Three North American Strains of <i>Aedes Albopictus</i> for West Nile Virus1. <i>J. Am. Mosq. Control Assoc.</i> <b>2002</b> , <i>18</i> , 284–289.                                                                                                                   |
|                                | Tiawsirisup, S.; Platt, K.B.; Evans, R.B.; Rowley, W.A. A Comparison of West Nile Virus Transmission by <i>Ochlerotatus trivittatus</i> (COQ.), <i>Culex pipiens</i> (L.), and <i>Aedes albopictus</i> (Skuse). <i>Vector-Borne Zoonotic Dis.</i> <b>2005</b> , <i>5</i> , 40–47.                                                                                  |
|                                | Vanlandingham, D.L.; McGee, C.E.; Klinger, K.A.; Vessey, N.; Fredregillo, C.; Higgs, S. Short report: Relative susceptibilities of South Texas mosquitoes to infection with West Nile virus. <i>Am. J. Trop. Med. Hyg.</i> <b>2007</b> , <i>77</i> , 925–928.                                                                                                      |
| Yellow fever                   | Amraoui, F.; Ayed, W. Ben; Madec, Y.; Faraj, C.; Himmi, O.; Btissam, A.; Sarih, M.; Failloux, A.B. Potential of <i>aedes albopictus</i> to cause the emergence of arboviruses in Morocco. <i>PLoS Negl. Trop. Dis.</i> <b>2019</b> , <i>13</i> , e0006997.                                                                                                         |
|                                | Couto-Lima, Di; Madec, Y.; Bersot, M.I.; Campos, S.S.; Motta, M.D.A.; Dos Santos, F.B.; Vazeille, M.; Da Costa Vasconcelos, P.F.; Lourenço-De-Oliveira, R.; Failloux, A.B. Potential risk of re-emergence of urban transmission of Yellow Fever virus in Brazil facilitated by competent <i>Aedes</i> populations. <i>Sci. Rep.</i> <b>2017</b> , <i>7</i> , 4848. |
|                                | Johnson, B.; Chambers, T.; Grabtree, M.; Filippis, A.; Vilarinhos, P.; Resende, M.; Marcoris, L.; Miller, B. Vector competence of Brazilian <i>Aedes aegypti</i> and <i>Ae. albopictus</i> for a Brazilian yellow fever virus isolate *. <i>Trans. R. Soc. Trop. Med. Hyg.</i> <b>2002</b> , <i>96</i> , 611–613.                                                  |

**Table S4.** Continued

| Virus Name   | References                                                                                                                                                                                                                                                                                                                        |
|--------------|-----------------------------------------------------------------------------------------------------------------------------------------------------------------------------------------------------------------------------------------------------------------------------------------------------------------------------------|
| Yellow fever | Lourenço de Oliveira, R.; Vazelle, M.; Maria, A.N.A.; Filippis, B.D.E.; Failloux, A. Large genetic differentiation and low variation in vector competence for dengue and yellow fever viruses of <i>Aedes albopictus</i> from Brazil, the United States, and the Cayman Islands. <i>Am. J. Trop. Med. Hyg.</i> 2003, 69, 105–114. |
|              | Miller, B.R.; Mitchell, C.J.; Ballinger, M.E. Replication, tissue tropisms and transmission of yellow fever virus in <i>Aedes albopictus</i> . <i>Trans. R. Soc. Trop. Med. Hyg.</i> 1989, 83, 252–255.                                                                                                                           |
|              | Mitchell, C.J.; Miller, B.R.; Gubler, D.J. Vector competence of <i>Aedes albopictus</i> from Houston, Texas, for dengue serotypes 1 to 4, yellow fever and Ross River viruses. <i>J. Am. Mosq. Control Assoc.</i> 1987, 3, 460–465.                                                                                               |

**Table S5:** Natural detection or isolation of arboviruses in *Ae. albopictus* from field-collected mosquitoes.

| Virus Name | Detection | Isolation | References                                                                                                                                                                                                                                                                                                                                                   |
|------------|-----------|-----------|--------------------------------------------------------------------------------------------------------------------------------------------------------------------------------------------------------------------------------------------------------------------------------------------------------------------------------------------------------------|
| CVV        | -         | +         | Armstrong, P.M.; Anderson, J.F.; Farajollahi, A.; Healy, S.P.; Unlu, I.; Crepeau, T.N.; Gaugler, R.; Fonseca, D.M.; Andreadis, T.G. Isolations of Cache Valley virus from <i>Aedes albopictus</i> (Diptera: Culicidae) in New Jersey and evaluation of its role as a regional arbovirus vector. <i>J. Med. Entomol.</i> <b>2013</b> , <i>50</i> , 1310–1314. |
|            | -         | +         | Mitchell, C.J.; Haramis, L.D.; Karabatsos, N.; Smith, G.C.; Starwalt, V.J. Isolation of La Crosse, Cache Valley, and Potosi Viruses from <i>Aedes</i> Mosquitoes (Diptera: Culicidae) Collected at Used-Tire Sites in Illinois during 1994–1995. <i>J. Med. Entomol.</i> <b>1998</b> , <i>35</i> , 573–577.                                                  |
| EEEV       | -         | +         | Mitchell, C.J.; Niebylski, M.L.; Smith, G.C.; Karabatsos, N.; Martin, D.; Mutebi, J.P.; Craig, G.B.J.; Mahler, M.J. Isolation of eastern equine encephalitis virus from <i>Aedes albopictus</i> in Florida. <i>Science</i> <b>1992</b> , <i>257</i> , 526–527.                                                                                               |
| KEYV       | -         | +         | Mitchell, C.J.; Niebylski, M.L.; Smith, G.C.; Karabatsos, N.; Martin, D.; Mutebi, J.P.; Craig, G.B.J.; Mahler, M.J. Isolation of eastern equine encephalitis virus from <i>Aedes albopictus</i> in Florida. <i>Science</i> <b>1992</b> , <i>257</i> , 526–527.                                                                                               |
|            | +         | -         | Westby, K.M.; Fritzen, C.; Paulsen, D.; Poindexter, S.; Moncayo, A.C. La Crosse Encephalitis Virus Infection in Field-Collected <i>Aedes albopictus</i> , <i>Aedes japonicus</i> , and <i>Aedes triseriatus</i> in Tennessee. <i>J. Am. Mosq. Control Assoc.</i> <b>2015</b> , <i>31</i> , 233–241.                                                          |
| LACV       | -         | +         | Gerhardt, R.R.; Gottfried, K.L.; Apperson, C.S.; Davis, B.S.; Erwin, P.C.; Smith, A.B.; Panella, N.A.; Powell, E.E.; Nasci, R.S. First isolation of La Crosse virus from naturally infected <i>Aedes albopictus</i> . <i>Emerg. Infect. Dis.</i> <b>2001</b> , <i>7</i> , 807–811.                                                                           |
|            | -         | +         | Lambert, A.J.; Blair, C.D.; D’Anton, M.; Ewing, W.; Harborth, M.; Seiferth, R.; Xiang, J.; Lanciotti, R.S. La Crosse Virus in <i>Aedes albopictus</i> Mosquitoes, Texas, USA, 2009. <i>Emerg. Infect. Dis.</i> <b>2010</b> , <i>16</i> , 856–858.                                                                                                            |
|            | -         | +         | Mitchell, C.J.; Haramis, L.D.; Karabatsos, N.; Smith, G.C.; Starwalt, V.J. Isolation of La Crosse, Cache Valley, and Potosi Viruses from <i>Aedes</i> Mosquitoes (Diptera: Culicidae) Collected at Used-Tire Sites in Illinois during 1994–1995. <i>J. Med. Entomol.</i> <b>1998</b> , <i>35</i> , 573–577.                                                  |
| POTV       | -         | +         | Francy, D.; Krabatsos, N.; Wesson, C.; Moore, J.; Lazwick, J.; Niebylski, T.; Tsai, T.; Craig, J. A new Arbovirus from <i>Aedes albopictus</i> , an Asian mosquito Established in the United States. <i>Science (80-. )</i> . <b>1990</b> , <i>250</i> , 1738–1740.                                                                                          |
|            | -         | +         | Harrison, B.A.; Mitchell, C.J.; Apperson, C.S.; Smith, G.C.; Karabatsos, N.; Engber, B.R.; Newton, N.H. Isolation of potosi virus from <i>Aedes albopictus</i> in North Carolina. <i>J Am Mosq Control Assoc</i> <b>1995</b> , <i>11</i> , 225–229.                                                                                                          |
|            | -         | +         | Mitchell, C.J.; Haramis, L.D.; Karabatsos, N.; Smith, G.C.; Starwalt, V.J. Isolation of La Crosse, Cache Valley, and Potosi Viruses from <i>Aedes</i> Mosquitoes (Diptera: Culicidae) Collected at Used-Tire Sites in Illinois during 1994–1995. <i>J. Med. Entomol.</i> <b>1998</b> , <i>35</i> , 573–577.                                                  |
| TENV       | -         | +         | Mitchell, C.J.; Niebylski, M.L.; Smith, G.C.; Karabatsos, N.; Martin, D.; Mutebi, J.P.; Craig, G.B.J.; Mahler, M.J. Isolation of eastern equine encephalitis virus from <i>Aedes albopictus</i> in Florida. <i>Science</i> <b>1992</b> , <i>257</i> , 526–527.                                                                                               |
| USUV       | +         | -         | Puggioli, A.; Bonilauri, P.; Calzolari, M.; Lelli, D.; Carrieri, M.; Urbanelli, S.; Pudar, D.; Bellini, R. Does <i>Aedes albopictus</i> (Diptera: Culicidae) play any role in Usutu virus transmission in Northern Italy? Experimental oral infection and field evidences. <i>Acta Trop.</i> <b>2017</b> , <i>172</i> , 192–196.                             |
|            | +         | -         | Cupp, E.W.; Hassan, H.K.; Yue, X.; Oldland, W.K.; Lilley, B.M.; Unnasch, T.R. West Nile Virus Infection in Mosquitoes in the Mid-South USA, 2002–2005. <i>J. Med. Entomol.</i> <b>2007</b> , <i>44</i> , 117–125.                                                                                                                                            |
| WNV        | +         | -         | Farajollahi, A.; Kesavaraju, B.; Price, D.C.; Williams, G.M.; Healy, S.P.; Gaugler, R.; Nelder, M.P. Field efficacy of BG-Sentinel and industry-standard traps for <i>Aedes albopictus</i> (Diptera: Culicidae) and West Nile virus surveillance. <i>J. Med. Entomol.</i> <b>2009</b> , <i>46</i> , 919–25.                                                  |
|            | +         | -         | Holick, J.; Kyle, A.; Ferraro, W.; Delaney, R.; Marta, I. Discovery of <i>Aedes albopictus</i> infected with west nile virus in Southeastern Pennsylvania. <i>J. Am. Mosq. Control Assoc. INC.</i> <b>2002</b> , <i>18</i> , 131.                                                                                                                            |

CCV, Cache Valley virus; EEEV, Eastern Equine Encephalomyelitis virus; KEYV, Keystone virus; LACV, La Crosse virus; POTV, Potosi virus; TENV, Tensaw virus; USUV, Usutu virus; WNV, West Nile virus.

**Table S6.** Geographic distribution, vertebrate hosts and potential vectors of arboviruses isolated or tested for vector competence in *Ae. albopictus*. Information on hosts and virus isolation from field-collected mosquitoes are from the arbocat database (<https://wwwn.cdc.gov/arbocat>). Arbovirus isolated (+) or not (-) from *Ae. albopictus*.

| Virus                            | Virus Family                     | Virus Genus     | Geographic Distribution  | Natural Host Family                    | Arthropod Isolation              |
|----------------------------------|----------------------------------|-----------------|--------------------------|----------------------------------------|----------------------------------|
| Cache Valley(+)                  | Peribunyaviridae                 | Orthobunyavirus | Canada<br>USA<br>Jamaica | Atelidae                               | <i>Aedes sollicitans</i>         |
|                                  |                                  |                 |                          | Canidae                                | <i>Aedes taeniorhynchus</i>      |
|                                  |                                  |                 |                          | Cervidae                               | <i>Anopheles crucians</i>        |
|                                  |                                  |                 |                          | Equidae                                | <i>Anopheles grabhamii</i>       |
|                                  |                                  |                 |                          | Humans                                 | <i>Anopheles quadrimaculatus</i> |
|                                  |                                  |                 |                          | Procyonidae                            | <i>Culiseta inornata</i>         |
|                                  |                                  |                 |                          | Other<br>unidentified<br>animals       | <i>Psorophora confinnis</i>      |
|                                  |                                  |                 |                          | Eastern equine<br>encephalomyelitis(+) | Togaviridae                      |
| Canidae                          | <i>Aedes fulvus pallens</i>      |                 |                          |                                        |                                  |
| Cricetidae                       | <i>Aedes mitchellae</i>          |                 |                          |                                        |                                  |
| Didelphidae                      | <i>Aedes sollicitans</i>         |                 |                          |                                        |                                  |
| Echimyidae                       | <i>Aedes sticticus</i>           |                 |                          |                                        |                                  |
| Equidae                          | <i>Aedes taeniorhynchus</i>      |                 |                          |                                        |                                  |
| Humans                           | <i>Aedes vexans</i>              |                 |                          |                                        |                                  |
| Muridae                          | <i>Anopheles crucians</i>        |                 |                          |                                        |                                  |
| Phasianidae                      | <i>Coquillettidia perturbans</i> |                 |                          |                                        |                                  |
| Other<br>unidentified<br>animals | <i>Culex nigripalpus</i>         |                 |                          |                                        |                                  |
|                                  | <i>Culex quinquefasciatus</i>    |                 |                          |                                        |                                  |
|                                  | <i>Culex restuans</i>            |                 |                          |                                        |                                  |
|                                  | <i>Culex salinarius</i>          |                 |                          |                                        |                                  |
|                                  | <i>Culex taeniopus</i>           |                 |                          |                                        |                                  |
|                                  | <i>Culiseta melanura</i>         |                 |                          |                                        |                                  |
|                                  | <i>Dermanyssus gallinae</i>      |                 |                          |                                        |                                  |
|                                  | <i>Eomenocanthus stramineus</i>  |                 |                          |                                        |                                  |
|                                  | <i>Eusimulium johannseni</i>     |                 |                          |                                        |                                  |
|                                  | <i>Simulium meridionale</i>      |                 |                          |                                        |                                  |
| Keystone(+)                      | Peribunyaviridae                 | Orthobunyavirus | USA                      | Cervidae                               | <i>Aedes atlanticus</i>          |
|                                  |                                  |                 |                          | Cricetidae                             | <i>Aedes aurifer</i>             |
|                                  |                                  |                 |                          | Other<br>unidentified<br>animals       | <i>Aedes infirmatus</i>          |
|                                  |                                  |                 |                          |                                        | <i>Aedes taeniorhynchus</i>      |
|                                  |                                  |                 |                          |                                        | <i>Anopheles crucians</i>        |
|                                  | <i>Culex nigripalpus</i>         |                 |                          |                                        |                                  |
| La Crosse(+)                     | Peribunyaviridae                 | Orthobunyavirus | USA                      | Humans<br>Sciuridae                    | Unknown                          |
| Potosi(+)                        | Peribunyaviridae                 | Orthobunyavirus | USA                      | Unknown                                | Unknown                          |
| Tensaw(+)                        | Peribunyaviridae                 | Orthobunyavirus | USA                      | Bovidae                                | <i>Aedes atlanticus</i>          |
|                                  |                                  |                 |                          | Bovidae                                | <i>Aedes atlanticus</i>          |
|                                  |                                  |                 |                          | Canidae                                | <i>Aedes infirmatus</i>          |
|                                  |                                  |                 |                          | Cricetidae                             | <i>Aedes mitchellae</i>          |
|                                  |                                  |                 |                          | Humans                                 | <i>Aedes taeniorhynchus</i>      |
|                                  |                                  |                 |                          | Leporidae                              | <i>Anopheles crucians</i>        |
|                                  |                                  |                 |                          | Phasianidae                            | <i>Anopheles punctipennis</i>    |
|                                  |                                  |                 |                          | Procyonidae                            | <i>Anopheles quadrimaculatus</i> |
|                                  |                                  |                 |                          | Other<br>unidentified<br>animals       | <i>Culex nigripalpus</i>         |
|                                  |                                  |                 |                          |                                        | <i>Culex salinarius</i>          |
|                                  |                                  |                 |                          |                                        | <i>Mansonia perturbans</i>       |
|                                  |                                  |                 |                          |                                        | <i>Psorophora confinnis</i>      |

Table S6. Continued

| Virus         | Virus Family  | Virus Genus               | Geographic Distribution | Natural Host Family | Arthropod Isolation             |
|---------------|---------------|---------------------------|-------------------------|---------------------|---------------------------------|
| West Nile(+)  | Flaviviridae  | Flavivirus                | Mozambique              | Camelidae           | <i>Aedes cantans</i>            |
|               |               |                           | Cent. Af. Rep.          | Equidae             | <i>Anopheles coustani</i>       |
|               |               |                           | Congo                   | Humans              | <i>Anopheles subpictus</i>      |
|               |               |                           | Egypt                   | Muridae             | <i>Anopheles maculipennis</i>   |
|               |               |                           | Uganda                  | Other               | <i>Argas hermanni</i>           |
|               |               |                           | Nigeria                 | unidentified        | <i>Coquillettidia metallica</i> |
|               |               |                           | Turkey                  | animals             | <i>Culex antennatus</i>         |
|               |               |                           | Cyprus                  |                     | <i>Culex modestus</i>           |
|               |               |                           | Israel                  |                     | <i>Culex quinquefasciatus</i>   |
|               |               |                           | France                  |                     | <i>Culex univittatus</i>        |
|               |               |                           | Portugal                |                     | <i>Culex vishmii</i>            |
|               |               |                           | Eastern Europe          |                     | <i>Culex weschei</i>            |
|               |               |                           | Albania                 |                     | <i>Hyalomma plumbeum</i>        |
|               |               |                           | India                   |                     |                                 |
|               |               |                           | Malaysia                |                     |                                 |
| Philippines   |               |                           |                         |                     |                                 |
| Thailand      |               |                           |                         |                     |                                 |
| Arumowot(-)   | Phenuiviridae | Phlebovirus               | Cent. Af. Rep.          | Muridae             | <i>Culex antennatus</i>         |
|               |               |                           | Ethiopia                | Turdidae            | <i>Culex rubinotus</i>          |
|               |               |                           | Kenya                   | Other               | <i>Mansonia uniformis</i>       |
|               |               |                           | Nigeria                 | unidentified        |                                 |
|               |               |                           | Rhodesia                | animals             |                                 |
| South Africa  |               |                           |                         |                     |                                 |
| Sudan         |               |                           |                         |                     |                                 |
| Bujaru(-)     | Phenuiviridae | Phlebovirus               | Brazil                  | Echimyidae          |                                 |
| Bussuquara(-) | Flaviviridae  | Flavivirus                | Brazil                  | Atelidae            | <i>Culex (Mel) sp.</i>          |
|               |               |                           | Colombia                | Echimyidae          | <i>Culex (Mel) taeniopus</i>    |
|               |               |                           | Panama                  | Humans              | <i>Culex crybda</i>             |
|               |               |                           |                         | Other               | <i>Culex sp.</i>                |
|               |               |                           |                         | unidentified        | <i>Culex vomerifer</i>          |
|               |               |                           |                         |                     | <i>Mansonia titillans</i>       |
|               |               | <i>Trichoprosopon sp.</i> |                         |                     |                                 |
| Chandipura(-) | Rhabdoviridae | Vesiculovirus             | India                   | Bovidae             | <i>Phlebotomus sp.</i>          |
|               |               |                           | Nigeria                 | Camelidae           |                                 |
|               |               |                           |                         | Cercopithecoid      |                                 |
|               |               |                           |                         | Equidae             |                                 |
|               |               |                           |                         | Erinaceidae         |                                 |
|               |               |                           |                         | Humans              |                                 |
| Chilibre(-)   | Phenuiviridae | Phlebovirus               | Panama                  | Unknown             | <i>Lutzomyia ssp.</i>           |
|               |               |                           |                         |                     | <i>Lutzomyia trapidoi</i>       |
|               |               |                           |                         |                     | <i>Lutzomyia ylephilatrix</i>   |
| Getah(-)      | Togaviridae   | Alphavirus                | Australia               | Humans              | <i>Aedes vexans nip.</i>        |
|               |               |                           | Cambodia                |                     | <i>Anopheles amictus</i>        |
|               |               |                           | Japan                   |                     | <i>Culex (Culex) gelidus</i>    |
|               |               |                           | Malaysia                |                     | <i>Culex tritaeniorhynchus</i>  |
|               |               |                           | Philippines             |                     | <i>Culex vishmii</i>            |

Table S6. Continued

| Virus                    | Virus Family     | Virus Genus     | Geographic Distribution                                                        | Natural Host Family                                                     | Arthropod Isolation                                                                                                                                                                                                                     |
|--------------------------|------------------|-----------------|--------------------------------------------------------------------------------|-------------------------------------------------------------------------|-----------------------------------------------------------------------------------------------------------------------------------------------------------------------------------------------------------------------------------------|
| Icoaraci(-)              | Phenuiviridae    | Phlebovirus     | Brazil                                                                         | Bovidae<br>Cricetidae<br>Echimyidae                                     | Unknown                                                                                                                                                                                                                                 |
| Ilheus(-)                | Flaviviridae     | Flavivirus      | Argentina<br>Brazil<br>Colombia<br>Guatemala<br>Honduras<br>Panama<br>Trinidad | Bovidae<br>Equidae<br>Suidae<br>Humans<br>Other<br>unidentified         | <i>Aedes</i> spp.<br><i>Coquillettidia</i> spp.<br><i>Culex</i> spp.<br><i>Haemagogus</i> spp.<br><i>Psorophora</i> spp.<br><i>Sabethes</i> spp.<br><i>Trichopropion</i> spp.<br><i>Wyeomia</i> spp.                                    |
| Itaporanga(-)            | Phenuiviridae    | Phlebovirus     | Brazil<br>French Guiana<br>Trinidad                                            | Didelphidae<br>Humans<br>Muridae<br>Other<br>unidentified               | <i>Coquillettidia venezuelensis</i><br><i>Culex caudelli</i><br><i>Culex eastor</i>                                                                                                                                                     |
| Jamestown canyon(-)      | Peribunyaviridae | Orthobunyavirus | USA<br>Canada                                                                  | Cervidae<br>Humans                                                      | <i>Aedes cantator</i><br><i>Aedes vexans</i><br><i>Aedes abserratus</i><br><i>Aedes communis</i><br><i>Aedes</i> spp.<br><i>Aedes stimulans</i><br><i>Aedes triseriatus</i><br><i>Chrysops cincticornis</i><br><i>Culiseta inornata</i> |
| Japanese Encephalitis(-) | Flaviviridae     | Flavivirus      | Easter Asia                                                                    | Ardeidae<br>Equidae<br>Hipposiderida<br>Humans<br>Mnipteridae<br>Suidae | <i>Anopheles barbirostris</i><br><i>Anopheles hyrcanus</i><br><i>Culex annulus</i><br><i>Culex fuscocephala</i><br><i>Culex gelidus</i><br><i>Culex pipiens</i><br><i>Culex tritaeniorhynchus</i><br><i>Culex vishnui</i>               |
| Karimabad(-)             | Phenuiviridae    | Phlebovirus     | Bangladesh<br>Eastern Europe<br>Egypt<br>Iran<br>Pakistan<br>Sudan             | Bovidae<br>Columbidae<br>Humans<br>Muridae<br>Phasianidae               | <i>Phlebotomus</i> spp                                                                                                                                                                                                                  |
| Keystone(-)              | Peribunyaviridae | Orthobunyavirus | USA                                                                            | Unknown                                                                 | <i>Chrysops obsoletus</i>                                                                                                                                                                                                               |
| Kokobera(-)              | Flaviviridae     | Flavivirus      | Australia<br>New Guinea                                                        | Bovidae<br>Equidae<br>Macropodidae<br>Humans                            | <i>Aedes</i> spp.<br><i>Aedes vigilax</i><br><i>Culex annulirostris</i>                                                                                                                                                                 |
| Kujin(-)                 | Flaviviridae     | Flavivirus      | Australia<br>Borneo<br>Indonesia<br>Malaysia<br>New Guinea<br>Sarawak          | Bovidae<br>Equidae<br>Humans<br>Oriolidae<br>Phasianidae                | <i>Culex annulirostris</i><br><i>Culex pseudovishnui</i><br><i>Culex squamosus</i>                                                                                                                                                      |

Table S6. Continued

| Virus                       | Virus Family     | Virus Genus     | Geographic Distribution | Natural Host Family                   | Arthropod Isolation                  |
|-----------------------------|------------------|-----------------|-------------------------|---------------------------------------|--------------------------------------|
| Mayaro(-)                   | Togaviridae      | Alphavirus      | USA                     | Callitrichidae                        | <i>Culex spp.</i>                    |
|                             |                  |                 | Bolivia                 | Cebidae                               | <i>Gigantolaelaps sp.</i>            |
|                             |                  |                 | Brazil                  | Columbidae                            | <i>Haemagogus spp.</i>               |
|                             |                  |                 | Colombia                | Didelphidae                           | <i>Mansonia venezuelensis</i>        |
|                             |                  |                 | Guyana                  | Humans                                | <i>Psorophora spp.</i>               |
|                             |                  |                 | Surinam                 | Pitheciidae                           | <i>Sabethini spp.</i>                |
|                             |                  |                 | Trinidad                | Telidae                               |                                      |
|                             |                  |                 | Venezuela               | Tropiduridae<br>Other<br>unidentified |                                      |
| Oropuche(-)                 | Peribunyaviridae | Orthobunyavirus | Brazil                  | Atelidae                              | <i>Aedes serratus</i>                |
|                             |                  |                 | Colombia                | Bradypodidae                          | <i>Culex quinquefasciatus</i>        |
|                             |                  |                 | Trinidad                | Cebidae                               | <i>Culicoides paranensis</i>         |
|                             |                  |                 |                         | Humans                                | <i>Mansonia venezuelensis</i>        |
|                             |                  |                 |                         | Other<br>unidentified                 |                                      |
| Orungo(-)                   | Reoviridae       | Orbivirus       | Cent. Af. Rep.          | Bovidae                               | <i>Aedes aegypti</i>                 |
|                             |                  |                 | Central African         | Camelidae                             | <i>Aedes dentatus</i>                |
|                             |                  |                 | Ivory Coast             | Erinaceidae                           | <i>Anopheles funestus</i>            |
|                             |                  |                 | Nigeria                 | Humans                                | <i>Anopheles gambiae</i>             |
|                             |                  |                 | Senegal                 | Soricidae                             | <i>Culex perfuscus</i>               |
|                             |                  |                 | Sierra Leone            |                                       | <i>Culicoides sp.</i>                |
|                             |                  |                 | Uganda                  |                                       |                                      |
| Pacui(-)                    | Phenuiviridae    | Phlebovirus     | Brazil                  | Cricetidae                            | <i>Lutzomyia flaviscutellata</i>     |
|                             |                  |                 | Trinidad                | Didelphidae                           | <i>Lutzomyia infraspinosa</i>        |
|                             |                  |                 |                         | Echimyidae                            |                                      |
|                             |                  |                 |                         | Other<br>unidentified                 |                                      |
| Rift Valley Fever(-)        | Phenuiviridae    | Phlebovirus     | Egypt                   | Bovidae                               | <i>Aedes (Neomelanicionion)</i>      |
|                             |                  |                 | Kenya                   | Hipposiderid                          | <i>Aedes (Ochlerotatus) caballus</i> |
|                             |                  |                 | Nigeria                 | Humans                                | <i>Culex (Culex) theileri</i>        |
|                             |                  |                 | South Africa            | Pteropodidae                          | <i>Culicoides spp.</i>               |
|                             |                  |                 | Sudan                   | Other                                 | <i>Eretmapodites chrysogaster</i>    |
|                             |                  |                 | Uganda                  |                                       |                                      |
| Ross River(-)               | Togaviridae      | Alphavirus      | American Samoa          | Canidae                               | <i>Aedes normanensis</i>             |
|                             |                  |                 | Australia               | Equidae                               | <i>Aedes vigilax</i>                 |
|                             |                  |                 | New Guinea              | Humans                                | <i>Aedes vigilax</i>                 |
|                             |                  |                 |                         | Macropodida                           | <i>Anopheles amictus</i>             |
|                             |                  |                 |                         | Monarchidae                           | <i>Culex annulirostris</i>           |
|                             |                  |                 |                         | Petrociidae                           | <i>Culex spp.</i>                    |
|                             |                  |                 |                         | Suidae                                | <i>Mansonia uniformis</i>            |
| Saint Louis encephalitis(-) | Phenuiviridae    | Flavivirus      | Argentina               | Anatidae                              | <i>Aedes dorsalis</i>                |
|                             |                  |                 | Brazil                  | Apodidae                              | <i>Anopheles crucians</i>            |
|                             |                  |                 | Canada                  | Canidae                               | <i>Culex caudelli</i>                |
|                             |                  |                 | Haiti                   | Cardinalidae                          | <i>Culex coronator</i>               |
|                             |                  |                 | Jamaica                 | Columbidae                            | <i>Culex nigripalpus</i>             |
|                             |                  |                 | Mexico                  | Turdidae                              | <i>Culex peus</i>                    |
|                             |                  |                 | Surinam                 | Corvidae                              | <i>Culex pipiens</i>                 |
|                             |                  |                 | Trinidad                | Cricetidae                            | <i>Culex quinquefasciatus</i>        |
|                             |                  |                 | USA                     | Felidae                               | <i>Culex spissipes</i>               |
|                             |                  |                 | Venezuela               | Humans                                | <i>Culex taeniopus</i>               |
|                             |                  |                 |                         | Mimidae                               | <i>Culex tarsalis</i>                |
|                             |                  |                 |                         | Passeridae                            | <i>Culex virgultus</i>               |
|                             |                  |                 |                         | Pipridae                              | <i>Deinocerites pseudes</i>          |

Table S6. Continued

| Virus                                      | Virus Family     | Virus Genus     | Geographic Distribution                                                                                                                         | Natural Host Family                                                        | Arthropod Isolation                                                                                                                                                                                                                                                                                                            |
|--------------------------------------------|------------------|-----------------|-------------------------------------------------------------------------------------------------------------------------------------------------|----------------------------------------------------------------------------|--------------------------------------------------------------------------------------------------------------------------------------------------------------------------------------------------------------------------------------------------------------------------------------------------------------------------------|
| Saint Louis encephalitis(-)<br>(continued) |                  |                 |                                                                                                                                                 | Thraupidae<br>Other<br>unidentified                                        | <i>Dermacentor variabilis</i><br><i>Dermanyssus americanus</i><br><i>Dermanyssus gallinae</i><br><i>Gigantolaelaps</i> sp.<br><i>Ornithonyssus sylviarum</i><br><i>Psorophora ferox</i><br><i>Sabethes belisarioi</i><br><i>Sabethes chloropterus</i><br><i>Sabethes</i> ssp.<br><i>Trichopropon</i> sp.<br><i>Wyeomia</i> sp. |
| Salehabad(-)                               | Phenuiviridae    | Phlebovirus     | Bangladesh<br>Pakistan<br>Iran                                                                                                                  | Bovidae<br>Columbidae<br>Humans<br>Muridae<br>Passeridae<br>Phasianidae    | <i>Phlebotomus</i> spp.                                                                                                                                                                                                                                                                                                        |
| San Angelo(-)                              | Peribunyaviridae | Orthobunyavirus | USA                                                                                                                                             | Canidae<br>Cervidae<br>Didelphidae<br>Humans<br>Phasianidae<br>Procyonidae | <i>Anopheles pseudopunctipennis</i><br><i>Psorophora signipennis</i>                                                                                                                                                                                                                                                           |
| Trivittatus(-)                             | Peribunyaviridae | Orthobunyavirus | USA                                                                                                                                             | Cricetidae<br>Cervidae                                                     | <i>Aedes atlanticus</i><br><i>Aedes infirmatus</i><br><i>Aedes taeniorhynchus</i><br><i>Aedes triseriatus</i><br><i>Aedes trivittatus</i><br><i>Aedes vexas</i><br><i>Culex pipiens</i><br><i>Mansonia perturbans</i>                                                                                                          |
| Uganda S(-)                                | Flaviviridae     | Flavivirus      | Cent. Af. Rep.<br>Egypt<br>Gambia<br>India<br>Indonesia<br>Malaysia<br>Mozambique<br>Nigeria<br>Senegal<br>South Africa<br>Tanganyika<br>Uganda | Muscicapidae<br>Humans<br>Other<br>unidentified                            | <i>Aedes ingrami</i><br><i>Aedes longipalpis</i><br><i>Aedes natronius</i>                                                                                                                                                                                                                                                     |
| Urucuri(-)                                 | Phenuiviridae    | Phlebovirus     | Brazil                                                                                                                                          | Dasyproctidae<br>Cricetidae<br>Echimyidae                                  | Unknown                                                                                                                                                                                                                                                                                                                        |
| Usutu (+)                                  | Flaviviridae     | Flavivirus      | South Africa<br>Uganda<br>Nigeria<br>Cent. Af. Rep.<br>Senegal<br>Cameroun                                                                      | Man<br>Bovidae<br>Muridae<br>Bucerotidae<br>Pycnonotidae<br>Turdidae       | <i>Culex neavei</i><br><i>Coquillettidia aurites</i><br><i>Culex pipens</i><br><i>Culex perfuscus</i><br><i>Culex perexiguus</i><br><i>Mansonia africana</i><br><i>Aedes caspius</i>                                                                                                                                           |



**Table S7.** List of references used to analyse the vector competence of several mosquito-virus pairs: *Aedes aegypti*\*CHIKV, *Aedes aegypti*\*DENV-1, *Aedes aegypti*\*DENV-2, *Aedes aegypti*\*ZIKV, *Aedes albopictus*\*CHIKV, *Aedes albopictus*\*DENV\_1, *Aedes albopictus*\*DENV\_2, *Aedes albopictus*\*ZIKV, *Culex pipiens*\*WNV, and *Haemagogus leucocelenus*\*YFV.

---

#### Mosquito-virus pairs

---

##### *Ae. aegypti*\*CHIKV

Paupy, C.; Ollomo, B.; Kamgang, B.; Moutailler, S.; Rousset, D.; Demanou, M.; Hervé, J.-P.; Leroy, E.; Simard, F. Comparative role of *Aedes albopictus* and *Aedes aegypti* in the emergence of Dengue and Chikungunya in central Africa. *Vector Borne Zoonotic Dis.* **2010**, *10*, 259–266.

Vega-Rúa, A.; Lourenço-De-Oliveira, R.; Mousson, L.; Vazeille, M.; Fuchs, S.; Yébakima, A.; Gustave, J.; Girod, R.; Dusfour, I.; Leparç-Goffart, I.; et al. Chikungunya Virus Transmission Potential by Local *Aedes* Mosquitoes in the Americas and Europe. *PLoS Negl. Trop. Dis.* **2015**, *9*, e0003780.

Vega-Rúa, A.; Zouache, K.; Caro, V.; Diancourt, L.; Delaunay, P.; Grandadam, M.; Failloux, A.B. High Efficiency of Temperate *Aedes albopictus* to Transmit Chikungunya and Dengue Viruses in the Southeast of France. *PLoS One* **2013**, *8*, Honório, N.A.; Wiggins, K.; Câmara, D.C.P.; Eastmond, B.; Alto, B.W. Chikungunya virus vector competency of Brazilian and Florida mosquito vectors. *PLoS Negl. Trop. Dis.* **2018**, *12*, e0006521.

##### *Ae. aegypti*\*DENV-1

Calvez, E.; Guillaumot, L.; Girault, D.; Richard, V.; O'Connor, O.; Paoaafaite, T.; Teurlai, M.; Pocquet, N.; Cao-Lormeau, V.M.; Dupont-Rouzeyrol, M. Dengue-1 virus and vector competence of *Aedes aegypti* (Diptera: Culicidae) populations from New Caledonia. *Parasites and Vectors* **2017**, *10*, 1–8.

Gonçalves, C.M.; Melo, F.F.; Bezerra, J.M.T.; Chaves, B.A.; Silva, B.M.; Silva, L.D.; Pessanha, J.E.M.; Arias, J.R.; Secundino, N.F.C.; Norris, D.E.; et al. Distinct variation in vector competence among nine field populations of *Aedes aegypti* from a Brazilian dengue-endemic risk city. *Parasites and Vectors* **2014**, *7*, 320.

Poole-Smith, B.K.; Hemme, R.R.; Delorey, M.; Felix, G.; Gonzalez, A.L.; Amador, M.; Hunsperger, E.A.; Barrera, R. Comparison of Vector Competence of *Aedes mediiovittatus* and *Aedes aegypti* for Dengue Virus: Implications for Dengue Control in the Caribbean. *PLoS Negl. Trop. Dis.* **2015**, *9*, 1–11.

Richards, S.L.; Anderson, S.L.; Alto, B.W. Vector Competence of *Aedes aegypti* and *Aedes albopictus* (Diptera: Culicidae) for Dengue Virus in the Florida Keys. *J. Med. Entomol.* **2012**, *49*, 942–946.

##### *Ae. aegypti*\*DENV-2

Chepkorir, E.; Lutomiah, J.; Mutisya, J.; Mulwa, F.; Limbaso, K.; Orindi, B.; Ng'Ang'a, Z.; Sang, R. Vector competence of *Aedes aegypti* populations from Kilifi and Nairobi for dengue 2 virus and the influence of temperature. *Parasites and Vectors* **2014**, *7*, 435.

Diallo, M.; Ba, Y.; Faye, O.; Soumare, L.; Dia, I.; Sall, A.A. Vector competence of *Aedes aegypti* populations from Senegal for sylvatic and epidemic dengue 2 virus isolated in West Africa. *Trans. R. Soc. Trop. Med. Hyg.* **2008**, *102*, 493–498.

Gonçalves, C.M.; Melo, F.F.; Bezerra, J.M.T.; Chaves, B.A.; Silva, B.M.; Silva, L.D.; Pessanha, J.E.M.; Arias, J.R.; Secundino, N.F.C.; Norris, D.E.; et al. Distinct variation in vector competence among nine field populations of *Aedes aegypti* from a Brazilian dengue-endemic risk city. *Parasites and Vectors* **2014**, *7*, 320.

Poole-Smith, B.K.; Hemme, R.R.; Delorey, M.; Felix, G.; Gonzalez, A.L.; Amador, M.; Hunsperger, E.A.; Barrera, R. Comparison of Vector Competence of *Aedes mediiovittatus* and *Aedes aegypti* for Dengue Virus: Implications for Dengue Control in the Caribbean. *PLoS Negl. Trop. Dis.* **2015**, *9*, e0003462.

##### *Ae. aegypti*\*ZIKV

Amraoui, F.; Ayed, W. Ben; Madec, Y.; Faraj, C.; Himmi, O.; Btissam, A.; Sarih, M.; Failloux, A.B. Potential of *Aedes albopictus* to cause the emergence of arboviruses in Morocco. *PLoS Negl. Trop. Dis.* **2019**, *13*, e0006997.

Bonica, M.B.; Goenaga, S.; Martin, M.L.; Feroci, M.; Luppo, V.; Muttis, E.; Fabbri, C.; Morales, M.A.; Enria, D.; Micieli, M.V.; et al. Vector competence of *Aedes aegypti* for different strains of Zika virus in Argentina. *PLoS Negl. Trop. Dis.* **2019**, *13*, e0007433.

Calvez, E.; O'Connor, O.; Pol, M.; Rousset, D.; Faye, O.; Richard, V.; Tarantola, A.; Dupont-Rouzeyrol, M. Differential transmission of Asian and African Zika virus lineages by *Aedes aegypti* from New Caledonia. *Emerg. Microbes Infect.* **2018**, *7*, 159.

Chouin-Carneiro, T.; Vega-Rúa, A.; Vazeille, M.; Yébakima, A.; Girod, R.; Goindin, D.; Dupont-Rouzeyrol, M.; Lourenço-De-Oliveira, R.; Failloux, A.B. Differential Susceptibilities of *Aedes aegypti* and *Aedes albopictus* from the Americas to Zika Virus. *PLoS Negl. Trop. Dis.* **2016**, *10*, e4543.

Hall-Mendelin, S.; Pyke, A.T.; Moore, P.R.; Ritchie, S.A.; Moore, F.A.J.; Van Den Hurk, A.F. Characterization of a Western Pacific Zika Virus Strain in Australian *Aedes aegypti*. *Vector-Borne Zoonotic Dis.* **2018**, *18*, 317–322.

---

Table S7. Continued

| Mosquito-virus pairs                                                                                                                                                                                                                                                                                                                                                                                       |
|------------------------------------------------------------------------------------------------------------------------------------------------------------------------------------------------------------------------------------------------------------------------------------------------------------------------------------------------------------------------------------------------------------|
| <b><i>Ae. aegypti</i>*ZIKV (continued)</b>                                                                                                                                                                                                                                                                                                                                                                 |
| Heitmann, A.; Jansen, S.; Lühken, R.; Leggewie, M.; Badusche, M.; Pluskota, B.; Becker, N.; Vapalahti, O.; Schmidt-Chanasit, J.; Tannich, E. Experimental transmission of zika virus by mosquitoes from central Europe. <i>Eurosurveillance</i> <b>2017</b> , <i>22</i> , 14–17.                                                                                                                           |
| Hery, L.; Boullis, A.; Delannay, C.; Vega-Rúa, A. Transmission potential of African, Asian and American Zika virus strains by <i>Aedes aegypti</i> and <i>Culex quinquefasciatus</i> from Guadeloupe (French West Indies). <i>Emerg. Microbes Infect.</i> <b>2019</b> , <i>8</i> , 699–706.                                                                                                                |
| Hugo, L.E.; Stassen, L.; La, J.; Gosden, E.; Ekwudu, O.; Winterford, C.; Viennet, E.; Faddy, H.M.; Devine, G.J.; Frentiu, F.D. Vector competence of Australian <i>Aedes aegypti</i> and <i>Aedes albopictus</i> for an epidemic strain of Zika virus. <i>PLoS Negl. Trop. Dis.</i> <b>2019</b> , <i>13</i> , e0007281.                                                                                     |
| Liu, Z.; Zhou, T.; Lai, Z.; Zhang, Z.; Jia, Z.; Zhou, G.; Williams, T. Competence of <i>Aedes aegypti</i> , <i>Aedes albopictus</i> , and <i>Culex quinquefasciatus</i> mosquitoes as Zika Virus Vectors, China. <i>Emerg. Infect. Dis.</i> <b>2017</b> , <i>23</i> , 1085–1091.                                                                                                                           |
| Luca, M. Di; Severini, F.; Toma, L.; Boccolini, D.; Romi, R.; Remoli, M.E.; Sabbatucci, M.; Rizzo, C.; Venturi, G.; Rezza, G. Experimental studies of susceptibility of Italian <i>Aedes albopictus</i> to Zika virus. <i>Euro Surveill.</i> <b>2016</b> , <i>21</i> , 18.                                                                                                                                 |
| Main, B.J.; Nicholson, J.; Winokur, O.C.; Steiner, C.; Riemersma, K.K.; Stuart, J.; Takeshita, R.; Krasnec, M.; Barker, C.M.; Coffey, L.L. Vector competence of <i>Aedes aegypti</i> , <i>Culex tarsalis</i> , and <i>Culex quinquefasciatus</i> from California for Zika virus. <i>PLoS Negl. Trop. Dis.</i> <b>2018</b> , <i>12</i> , e0006524.                                                          |
| Richard, V.; Paoaafaite, T.; Cao-Lormeau, V.M. Vector Competence of French Polynesian <i>Aedes aegypti</i> and <i>Aedes polynesiensis</i> for Zika Virus. <i>PLoS Negl. Trop. Dis.</i> <b>2016</b> , <i>10</i> , e0005024.                                                                                                                                                                                 |
| <b><i>Aedes aegypti</i>*YFV</b>                                                                                                                                                                                                                                                                                                                                                                            |
| Couto-Lima, Di; Madec, Y.; Bersot, M.I.; Campos, S.S.; Motta, M.D.A.; Dos Santos, F.B.; Vazeille, M.; Da Costa Vasconcelos, P.F.; Lourenço-De-Oliveira, R.; Failloux, A.B. Potential risk of re-emergence of urban transmission of Yellow Fever virus in Brazil facilitated by competent <i>Aedes</i> populations. <i>Sci. Rep.</i> <b>2017</b> , <i>7</i> , 4848.                                         |
| Johnson, B.; Chambers, T.; Grabtree, M.; Filippis, A.; Vilarinhos, P.; Resende, M.; Marcoris, L.; Miller, B. Vector competence of Brazilian <i>Aedes aegypti</i> and <i>Ae. albopictus</i> for a Brazilian yellow fever virus isolate *. <i>Trans. R. Soc. Trop. Med. Hyg.</i> <b>2002</b> , <i>96</i> , 611–613.                                                                                          |
| Lourenço de Oliveira, R.; Vazeille, M.; Maria, A.N.A.; Filippis, B.D.E.; Failloux, A. Large genetic differentiation and low variation in vector competence for dengue and yellow fever viruses of <i>Aedes albopictus</i> from Brazil, the United States, and the Cayman Islands. <i>Am. J. Trop. Med. Hyg.</i> <b>2003</b> , <i>69</i> , 105–114.                                                         |
| Ellis, B.R.; Sang, R.C.; Horne, K.M.; Higgs, S.; Wesson, D.M. Yellow fever virus susceptibility of two mosquito vectors from Kenya, East Africa. <i>Trans. R. Soc. Trop. Med. Hyg.</i> <b>2012</b> , <i>106</i> , 387–389.                                                                                                                                                                                 |
| Yen, P.S.; Amraoui, F.; Rúa, A.V.; Failloux, A.B. <i>Aedes aegypti</i> mosquitoes from guadeloupe (French west indies) are able to transmit yellow fever virus. <i>PLoS One</i> <b>2018</b> , <i>13</i> , e0204710                                                                                                                                                                                         |
| Van Den Hurk, A.F.; McElroy, K.; Pyke, A.T.; McGee, C.E.; Hall-Mendelin, S.; Day, A.; Ryan, P.A.; Ritchie, S.A.; Vanlandingham, D.L.; Higgs, S. Vector competence of Australian mosquitoes for yellow fever virus. <i>Am. J. Trop. Med. Hyg.</i> <b>2011</b> , <i>85</i> , 446–451.                                                                                                                        |
| Jupp, P.G.; Kemp, A. Laboratory vector competence experiments with yellow fever virus and five South African mosquito species including <i>Aedes aegypti</i> . <i>Trans R Soc Trop Med Hyg</i> <b>2002</b> , <i>96</i> , 493–498.                                                                                                                                                                          |
| <b><i>Aedes albopictus</i>*CHIKV</b>                                                                                                                                                                                                                                                                                                                                                                       |
| Amraoui, F.; Ayed, W. Ben; Madec, Y.; Faraj, C.; Himmi, O.; Btissam, A.; Sarih, M.; Failloux, A.B. Potential of <i>Aedes albopictus</i> to cause the emergence of arboviruses in Morocco. <i>PLoS Negl. Trop. Dis.</i> <b>2019</b> , <i>13</i> , e0006997.                                                                                                                                                 |
| Fortuna, C.; Toma, L.; Remoli, M.E.; Amendola, A.; Severini, F.; Boccolini, D.; Romi, R.; Venturi, G.; Rezza, G.; Di Luca, M. Vector competence of <i>Aedes albopictus</i> for the Indian Ocean Lineage (IOL) chikungunya viruses of the 2007 and 2017 outbreaks in Italy: A comparison between strains with and without the E1:A226V mutation. <i>Eurosurveillance</i> <b>2018</b> , <i>23</i> , 1800246. |
| Honório, N.A.; Wiggins, K.; Câmara, D.C.P.; Eastmond, B.; Alto, B.W. Chikungunya virus vector competency of Brazilian and Florida mosquito vectors. <i>PLoS Negl. Trop. Dis.</i> <b>2018</b> , <i>12</i> , e0006521.                                                                                                                                                                                       |
| Ngoagouni, C.; Kamgang, B.; Kazanji, M.; Paupy, C.; Nakouné, E. Potential of <i>Aedes aegypti</i> and <i>Aedes albopictus</i> populations in the Central African Republic to transmit enzootic chikungunya virus strains. <i>Parasites and Vectors</i> <b>2017</b> , <i>10</i> , 164.                                                                                                                      |
| Paupy, C.; Ollomo, B.; Kamgang, B.; Moutailler, S.; Rousset, D.; Demanou, M.; Hervé, J.-P.; Leroy, E.; Simard, F. Comparative role of <i>Aedes albopictus</i> and <i>Aedes aegypti</i> in the emergence of Dengue and Chikungunya in central Africa. <i>Vector Borne Zoonotic Dis.</i> <b>2010</b> , <i>10</i> , 259–266.                                                                                  |
| Vega-Rúa, A.; Zouache, K.; Caro, V.; Diancourt, L.; Delaunay, P.; Grandadam, M.; Failloux, A.B. High Efficiency of Temperate <i>Aedes albopictus</i> to Transmit Chikungunya and Dengue Viruses in the Southeast of France. <i>PLoS One</i> <b>2013</b> , <i>8</i> , e59716.                                                                                                                               |
| Vega-Rúa, A.; Lourenço-De-Oliveira, R.; Mousson, L.; Vazeille, M.; Fuchs, S.; Yébakima, A.; Gustave, J.; Girod, R.; Dusfour, I.; Leparc-Goffart, I.; et al. Chikungunya Virus Transmission Potential by Local <i>Aedes</i> Mosquitoes in the Americas and                                                                                                                                                  |

Table S7. Continued

| Mosquito-virus pairs                                                                                                                                                                                                                                                                                                                                                                                                                                                                                                                                                                                                                                                                                                                                                                                                                                                                                                                                                                                                                                                                                                                                                                                                                                                                                                                                                                                                                                                                                                                                                                                                                                                                                                                                                                                                                                                                                                                                                                                                                                                                                                                                                                                                                                                                                                                                                                                                                                                                                                                                                                                                                                                                                                                                                                                                                                             |
|------------------------------------------------------------------------------------------------------------------------------------------------------------------------------------------------------------------------------------------------------------------------------------------------------------------------------------------------------------------------------------------------------------------------------------------------------------------------------------------------------------------------------------------------------------------------------------------------------------------------------------------------------------------------------------------------------------------------------------------------------------------------------------------------------------------------------------------------------------------------------------------------------------------------------------------------------------------------------------------------------------------------------------------------------------------------------------------------------------------------------------------------------------------------------------------------------------------------------------------------------------------------------------------------------------------------------------------------------------------------------------------------------------------------------------------------------------------------------------------------------------------------------------------------------------------------------------------------------------------------------------------------------------------------------------------------------------------------------------------------------------------------------------------------------------------------------------------------------------------------------------------------------------------------------------------------------------------------------------------------------------------------------------------------------------------------------------------------------------------------------------------------------------------------------------------------------------------------------------------------------------------------------------------------------------------------------------------------------------------------------------------------------------------------------------------------------------------------------------------------------------------------------------------------------------------------------------------------------------------------------------------------------------------------------------------------------------------------------------------------------------------------------------------------------------------------------------------------------------------|
| <p><b><i>Aedes albopictus</i>*DENV-1</b><br/>           Brustolin, M.; Santamaria, C.; Napp, S.; VerdÚn, M.; Rivas, R.; Pujol, N.; Talavera, S.; Busquets, N. Experimental study of the susceptibility of a European <i>Aedes albopictus</i> strain to dengue virus under a simulated Mediterranean temperature regime. <i>Med. Vet. Entomol.</i> <b>2018</b>, <i>32</i>, 393–398.</p> <p>Richards, S.L.; Anderson, S.L.; Alto, B.W. Vector Competence of <i>Aedes aegypti</i> and <i>Aedes albopictus</i> (Diptera: Culicidae) for Dengue Virus in the Florida Keys. <i>J. Med. Entomol.</i> <b>2012</b>, <i>49</i>, 942–946.</p>                                                                                                                                                                                                                                                                                                                                                                                                                                                                                                                                                                                                                                                                                                                                                                                                                                                                                                                                                                                                                                                                                                                                                                                                                                                                                                                                                                                                                                                                                                                                                                                                                                                                                                                                                                                                                                                                                                                                                                                                                                                                                                                                                                                                                               |
| <p><b><i>Aedes albopictus</i>*DENV-2</b><br/>           Amraoui, F.; Aayed, W. Ben; Madec, Y.; Faraj, C.; Himmi, O.; Btissam, A.; Sarih, M.; Failloux, A.B. Potential of aedes albopictus to cause the emergence of arboviruses in Morocco. <i>PLoS Negl. Trop. Dis.</i> <b>2019</b>, <i>13</i>, e0006997.</p> <p>Brustolin, M. et al. Experimental study of the susceptibility of a European <i>Aedes albopictus</i> strain to dengue virus under a simulated Mediterranean temperature regime. <i>Med. Vet. Entomol.</i> <b>2018</b>, <i>32</i>, 393–398.</p> <p>Paupy, C. et al. Comparative role of <i>Aedes albopictus</i> and <i>Aedes aegypti</i> in the emergence of Dengue and Chikungunya in central Africa. <i>Vector Borne Zoonotic Dis.</i> <b>2010</b>, <i>10</i>, 259–266.</p>                                                                                                                                                                                                                                                                                                                                                                                                                                                                                                                                                                                                                                                                                                                                                                                                                                                                                                                                                                                                                                                                                                                                                                                                                                                                                                                                                                                                                                                                                                                                                                                                                                                                                                                                                                                                                                                                                                                                                                                                                                                                    |
| <p><b><i>Aedes albopictus</i>*ZIKV</b><br/>           Amraoui, F.; Aayed, W. Ben; Madec, Y.; Faraj, C.; Himmi, O.; Btissam, A.; Sarih, M.; Failloux, A.B. Potential of aedes albopictus to cause the emergence of arboviruses in Morocco. <i>PLoS Negl. Trop. Dis.</i> <b>2019</b>, <i>13</i>, e0006997.</p> <p>Heitmann, A.; Jansen, S.; Lühken, R.; Leggewie, M.; Badusche, M.; Pluskota, B.; Becker, N.; Vapalahti, O.; Schmidt-Chanasit, J.; Tannich, E. Experimental transmission of zika virus by mosquitoes from central Europe. <i>Eurosurveillance</i> <b>2017</b>, <i>22</i>, 14–17.</p> <p>Hugo, L.E.; Stassen, L.; La, J.; Gosden, E.; Ekwudu, O.; Winterford, C.; Viennet, E.; Faddy, H.M.; Devine, G.J.; Frentiu, F.D. Vector competence of Australian <i>Aedes aegypti</i> and <i>Aedes albopictus</i> for an epidemic strain of Zika virus. <i>PLoS Negl. Trop. Dis.</i> <b>2019</b>, <i>13</i>, e0007281.</p> <p>Liu, Z.; Zhou, T.; Lai, Z.; Zhang, Z.; Jia, Z.; Zhou, G.; Williams, T. Competence of <i>Aedes aegypti</i>, <i>Aedes albopictus</i>, and <i>Culex quinquefasciatus</i> mosquitoes as Zika Virus Vectors, China. <i>Emerg. Infect. Dis.</i> <b>2017</b>, <i>23</i>, 1085–1091.</p> <p>Luca, M. Di; Severini, F.; Toma, L.; Boccolini, D.; Romi, R.; Remoli, M.E.; Sabbatucci, M.; Rizzo, C.; Venturi, G.; Rezza, G. Experimental studies of susceptibility of Italian <i>Aedes albopictus</i> to Zika virus. <i>Euro Surveill.</i> <b>2016</b>, <i>21</i>, 18.</p> <p>González, M.A.; Pavan, M.G.; Fernandes, R.S.; Busquets, N.; David, M.R.; Lourenço-Oliveira, R.; García-Pérez, A.L.; Maclell-De-Freitas, R. Limited risk of Zika virus transmission by five <i>Aedes albopictus</i> populations from Spain. <i>Parasites and Vectors</i> <b>2019</b>, <i>12</i>, 150.</p>                                                                                                                                                                                                                                                                                                                                                                                                                                                                                                                                                                                                                                                                                                                                                                                                                                                                                                                                                                                                                                                   |
| <p><b><i>Culex pipiens</i>*WNV</b><br/>           Brustolin, M.; Talavera, S.; Nunez, A.; Santamaría, C.; Rivas, R.; Pujol, N.; Valle, M.; Verdun, M.; Brun, A.; Pages, N.; et al. Rift Valley fever virus and European mosquitoes: vector competence of <i>Culex pipiens</i> and <i>Stegomyia albopicta</i> (= <i>Aedes albopictus</i>). <i>Med. Vet. Entomol.</i> <b>2017</b>, <i>31</i>, 365–372.</p> <p>Fortuna, C.; Remoli, M.E.; Di Luca, M.; Severini, F.; Toma, L.; Benedetti, E.; Bucci, P.; Montarsi, F.; Minelli, G.; Boccolini, D.; et al. Experimental studies on comparison of the vector competence of four Italian <i>Culex pipiens</i> populations for West Nile virus. <i>Parasit. Vectors</i> <b>2015</b>, <i>8</i>, 463.</p> <p>Fros, J.J.; Miesen, P.; Vogels, C.B.; Gaibani, P.; Sambri, V.; Martina, B.E.; Koenraadt, C.J.; van Rij, R.P.; Vlak, J.M.; Takken, W.; et al. Comparative Usutu and West Nile virus transmission potential by local <i>Culex pipiens</i> mosquitoes in north-western Europe. <i>One Heal.</i> <b>2015</b>, <i>1</i>, 31–36.</p> <p>Goddard, L.B.; Roth, A.E.; Reisen, W.K.; Scott, T.W.; States, U. Vector Competence of California Mosquitoes for. <i>Emerg. Infect. Dis.</i> <b>2002</b>, <i>8</i>, 1385–1391.</p> <p>Ebel, G.D.; Rochlin, I.; Longacker, J.; Kramer, L.D. <i>Culex restuans</i> (Diptera: Culicidae) relative abundance and vector competence for West Nile Virus. <i>J. Med. Entomol.</i> <b>2005</b>, <i>42</i>, 838–843.</p> <p>Kilpatrick, A.; Fonseca, D.M.; Ebel, G.D.; Reddy, M.R.; Kramer, L.D. Spatial and temporal variation in vector competence of <i>Culex pipiens</i> and <i>Cx. restuans</i> mosquitoes for West Nile virus. <i>Am. J. Trop. Med. Hyg.</i> <b>2010</b>, <i>83</i>, 607–613.</p> <p>Richards, S.L.; Mores, C.N.; Lord, C.C.; Tabachnick, W.J. Impact of Extrinsic Incubation Temperature and Virus Exposure on Vector Competence of <i>Culex pipiens quinquefasciatus</i> Say (Diptera: Culicidae) for West Nile Virus. <i>Vector-Borne Zoonotic Dis.</i> <b>2007</b>, <i>7</i>, 629–636.</p> <p>Richards, S.L.; Anderson, S.L.; Lord, C.C. Vector competence of <i>Culex pipiens quinquefasciatus</i> (Diptera: Culicidae) for West Nile virus isolates from Florida. <i>Trop. Med. Int. Heal.</i> <b>2014</b>, <i>19</i>, 610–617.</p> <p>Anderson, S.L.; Richards, S.L.; Tabachnick, W.J.; Smartt, C.T. Effects of West Nile Virus Dose and Extrinsic Incubation Temperature on Temporal Progression of Vector Competence in <i>Culex pipiens quinquefasciatus</i>. <i>J. Am. Mosq. Control Assoc.</i> <b>2010</b>, <i>26</i>, 103–107.</p> <p>Turell, M.J.; Guinn, M.L.O.; Dohm, D.J.; Jones, J.W. Vector Competence of North American Mosquitoes (Diptera: Culicidae) for West Nile Virus. <i>J. Med. Entomol.</i> <b>2001</b>, <i>38</i>, 130–134.</p> |

Table S7. Continued

---

| <b>Mosquito-virus pairs</b>                                                                                                                                                                                                                                                                                                                                         |
|---------------------------------------------------------------------------------------------------------------------------------------------------------------------------------------------------------------------------------------------------------------------------------------------------------------------------------------------------------------------|
| <b><i>Culex pipiens</i>*WNV (continued)</b>                                                                                                                                                                                                                                                                                                                         |
| Vanlandingham, D.L.; McGee, C.E.; Klinger, K.A.; Vessey, N.; Fredregillo, C.; Higgs, S. Short report: Relative susceptibilities of South Texas mosquitoes to infection with West Nile virus. <i>Am. J. Trop. Med. Hyg.</i> <b>2007</b> , <i>77</i> , 925–928.                                                                                                       |
| Vaidyanathan, R.; Fleisher, A.E.; Minnick, S.L.; Simmons, K.A.; Scott, T.W. Nutritional Stress Affects Mosquito Survival and Vector Competence for West Nile Virus. <i>Vector-Borne Zoonotic Dis.</i> <b>2008</b> , <i>8</i> , 727–732.                                                                                                                             |
| <b><i>Haemagogus leucocelenu</i>*YFV</b>                                                                                                                                                                                                                                                                                                                            |
| Couto-Lima, Di.; Madec, Y.; Bersot, M.I.; Campos, S.S.; Motta, M.D.A.; Dos Santos, F.B.; Vazeille, M.; Da Costa Vasconcelos, P.F.; Lourenço-De-Oliveira, R.; Failloux, A.B. Potential risk of re-emergence of urban transmission of Yellow Fever virus in Brazil facilitated by competent <i>Aedes</i> populations. <i>Sci. Rep.</i> <b>2017</b> , <i>7</i> , 4848. |

---

**Figure S1.** Analysis of the host feeding patterns of *Ae. albopictus* for the different species of domestic animals without taking into account the host availability. Black line: median.

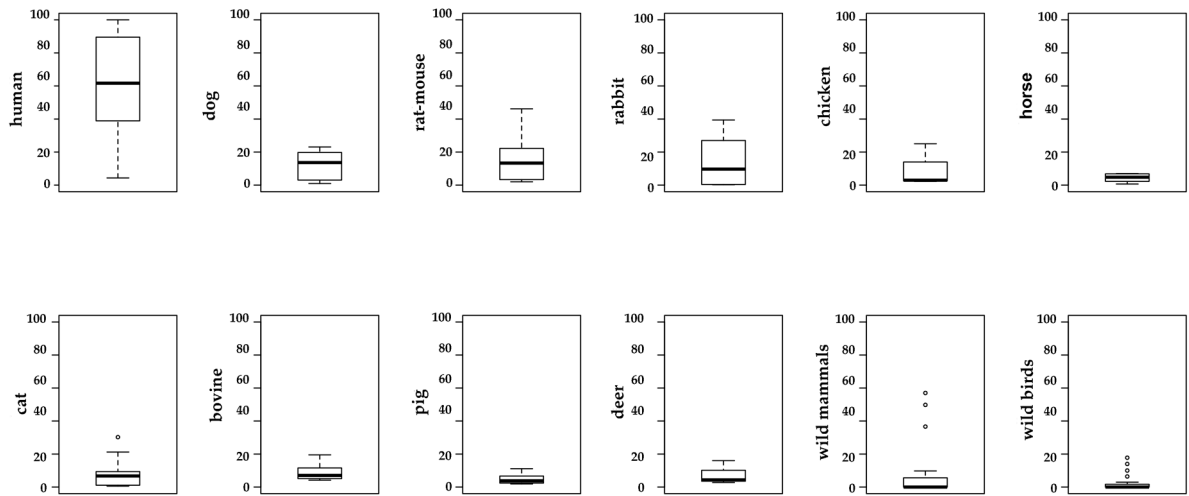

## Supplementary Material and Methods.

### Estimating the relative virus transfer risk mediated by *Ae. albopictus*.

We calculated the relative transfer risk of viruses mediated by *Ae. albopictus* from their natural host to humans by adapting Kilpatrick's equation:  $Risk = A \times P \times Fm \times Cv$ , where  $A$  corresponds to the mosquito abundance,  $P$  is the virus infection prevalence,  $Fm$  is the fraction of blood meals taken from mammals, and  $Cv$  corresponds to the fraction of infected mosquitoes that can transmit the virus in a subsequent bite. In our study and for all viruses, information on  $A$  and  $P$  were lacking, but as these two parameters are directly proportional fractions of the formula (i.e. the more we increase their value, the greater the risk is) we assumed that the absence of information should not affect the result of the risk assessment. We decomposed  $Fm$  in  $FAi$  (i.e. the mean relative frequency *Ae. albopictus* bites in vertebrate host families) and  $FHi$  (i.e. the mean relative frequency of *Ae. albopictus* bites in humans). We then calculated the average  $FAi$  and  $FHi$  using the information on *Ae. albopictus* feeding behavior extracted from the articles identified in our literature search. For such purpose, we listed all the natural vertebrate hosts of each virus using the information available in the CDC catalogue and then classified hosts according to their family. We calculated the mean frequency of *Ae. albopictus* biting for each family, when data were available.  $Cv$  is equal to the Transmission efficiency (TRi). In conclusion, for each virus in the present study, the risk assessment was calculated as  $TRi \times FAi \times FHi$ . The results are presented in Figure S2, but are not included in the main text due to the uncertainties in the calculation because of the limitations of the representative data on feeding behaviour, arbovirus hosts and vector competence to produce quantitative estimations and extrapolations

**Figure S2.** Relative virus transfer risk by *Ae. albopictus* for 13 enzootic viruses experimentally proven to be transmitted by *Ae. albopictus* and for four epidemic arboviruses (DENV-1, DENV-2, ZIKAV, and CHIKV).

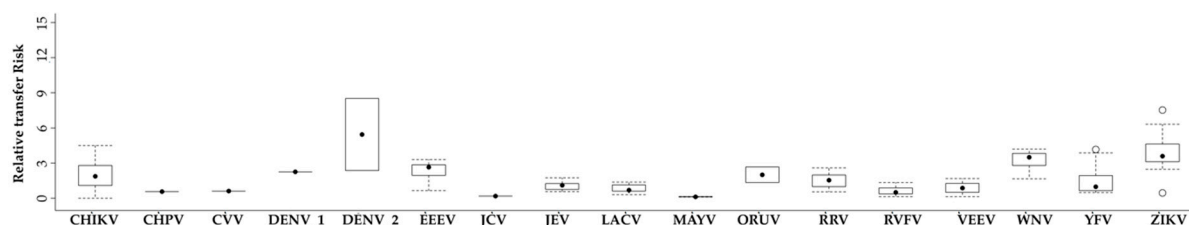

CHIKV, Chikungunya virus; CHPV, Chandipura virus; CVV, Cache Valley virus; DENV-1, Dengue virus serotype 1; DENV-2, Dengue virus serotype 2; EEEV, Eastern equine encephalomyelitis virus; JCV, Jamestown Canyon virus; JEV, Japanese encephalitis virus; LACV, La Crosse virus; MAYV, Mayaro virus; ORUV, Orungo virus; RRV, Ross River virus; RVFV, Rift Valley fever virus; VEEV, Venezuelan equine encephalitis virus; WNV, West Nile virus; YFV, Yellow fever virus; and ZIKV, Zika virus.

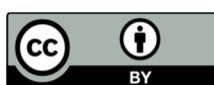

Supplement: pathogens-09-00266-s001.pdf [file pathogens-09-00266-s001.pdf]
